# Supplementary material for: The retro-ene reaction of gaseous immonium ions revisitedElectronic supplementary information (ESl) available: Table s1 [G2(MP2) total energies of the involved species] and Table s2 [archive entries for MP2(full)/6-31G(d) optimised geometries]. See http://www.rsc.org/suppdata/p2/b1/b105386h
Source: Royal Society of Chemistry journal article supplement (doi:10.1039/b105386h), 2001-11-09
Supplement: b105386h.doc [file b105386h.doc]

# Supplementary data

**Tables s1 and s2**

**Table s1**  G2(MP2) total energies of the involved species *a*

| Species | Energy | Species | Energy | |
| --- | --- | --- | --- | --- |
| **1** | –212.48032 | CH2=NHCH3+ | –134.02274 | |
| **complex1** | –212.44603 | CH2=NHCH2CH3+ | –173.25338 | |
| **2** | –251.71113 | CH3CH=NHCH3+ | –173.26820 | |
| **complex2** | –251.67723 | CH2=N(CH3)2+ | –173.25451 | |
| **3** | –251.72256 | **TS: 1  complex1** | –212.41694 | |
| **complex3** | –251.67675 | **TS: 2  complex2** | –251.64469 | |
| **4** | –251.71370 | **TS: 3  complex3** | –251.64744 | |
| **complex4** | –251.69095 | **TS: 4  complex4** | –251.65272 | |
| **5** | –251.70928 | **TS: 5  complex5** | –251.64792 | |
| **complex5** | –251.67813 | **TS: 6  complex6** | –251.65575 | |
| **6** | –251.70535 | **TS: 7  complex7** | –290.89617 | |
| **complex6** | –251.67715 | CH2=CH2 | –78.41481 | |
| **7** | –290.93402 | CH2=CHCH3 | –117.64288 | |
| **complex7** | –290.91132 | CH2=C(CH3)2 | –156.87322 | |
| *a* Values in Hartrees. | | | |  |

**Table 2** Archive entries for MP2(full)/6-31G(d) optimised geometries

**1**

1\1\MF-ELECTRON\Freq\RMP2-FU\6-31G(d)\C4H10N1(1+)\THEIS\10-Dec-1998\0\

\#N GEOM=ALLCHECK GUESS=READ RMP2(FULL)/6-31G(D) FREQ\\prmeimo\\1,1\N,

-1.1340314538,0.2202078791,-0.362313805\H,-1.2052526403,0.4195023671,-

1.3657481725\C,-1.945509467,-0.6399142234,0.134625914\C,-0.0630477454,

0.9374838552,0.3629060152\C,1.6305200481,-0.9400143443,0.0421385362\H,

-0.2606645632,2.0038961002,0.2243088181\H,-1.8894819104,-0.8738980591,

1.1924342043\H,-0.1741808922,0.6888119171,1.4209069555\C,1.3043758899,

0.5320789834,-0.1772517819\H,1.3737351812,0.7977811472,-1.238268277\H,

2.0332682382,1.163287289,0.340648622\H,2.6463536512,-1.1527630158,-0.2

948311134\H,0.9619565519,-1.6013645123,-0.5161271428\H,1.5732304524,-1

.2034834949,1.1020459825\H,-2.6787762457,-1.1210305184,-0.5036853438\\

Version=SGI-G94RevE.2\HF=-211.5030617\MP2=-212.1972195\RMSD=6.154e-10\

RMSF=1.420e-05\Dipole=-1.79877,0.0252122,-0.2471504\DipoleDeriv=-0.262

8706,0.0214881,-0.018292,0.0286282,-0.1935549,-0.0142113,0.1158345,0.0

314599,-0.1995723,0.2525879,-0.0773428,0.0211777,-0.0791419,0.2512591,

-0.0203338,-0.0355744,-0.0482681,0.308472,0.199099,0.0678016,-0.004650

6,0.0509383,0.184136,-0.0379602,-0.0764501,-0.0636328,0.2483775,0.3183

011,0.0631938,0.0806513,0.1216881,0.1833274,0.0478313,0.1754023,0.1353

195,0.1780811,-0.0647946,0.0582064,0.0403455,0.0213631,0.0275757,0.011

0096,0.0596946,0.0083205,0.0502663,0.0056092,0.0464222,-0.0162268,0.01

74846,0.035319,0.0001396,-0.0713964,0.0072018,0.0952996,0.1271613,-0.0

100442,-0.0602965,-0.0079738,0.1442902,-0.0418735,-0.0391315,-0.017663

2,0.1176468,0.0204615,-0.0402934,0.0501982,-0.0569022,0.0624397,0.0766

155,0.0061179,0.012455,0.011747,0.122956,-0.0583295,-0.0429198,-0.1173

408,0.0334221,-0.0197372,-0.1144649,-0.0815421,0.0840219,0.0493507,0.0

568824,-0.0366491,0.0496367,0.0250834,0.0366702,0.0152867,0.0490632,-0

.0741761,0.0039978,-0.03564,-0.0167513,0.0049587,0.0160512,-0.039578,-

0.0147488,-0.0434837,0.0605124,-0.0169896,0.0347614,0.0376681,0.028974

4,0.0643887,-0.0014358,0.0433729,-0.0067149,0.0914214,-0.0150878,-0.10

14157,-0.0869717,-0.044118,-0.0220311,-0.0185657,-0.0736384,-0.0373322

,0.013292,0.0860152,-0.019275,0.049738,0.0036779,0.0297744,0.0002627,0

.010166,0.0405994,-0.082982,0.1742028,-0.0064154,0.002979,-0.0218733,0

.1585192,0.0211665,-0.0004703,0.0142175,0.0975924\Polar=50.9286698,7.6

954387,43.7870082,-0.8273124,-1.9896804,41.2882625\PG=C01 [X(C4H10N1)]

\Nimag=0\\@

**complex1**

1\1\MF-ELECTRON\Freq\RMP2-FU\6-31G(d)\C4H10N1(1+)\THEIS\09-Dec-1998\0\

\#N GEOM=ALLCHECK GUESS=READ RMP2(FULL)/6-31G(D) FREQ\\Kompleks mellem

ethylen og methylmethyliden immonium\\1,1\N,1.3891837022,-0.477200610

1,-0.235121399\H,1.5786474747,-1.0632549516,-1.0518702951\C,2.17119985

19,0.7625655044,-0.1245628959\C,0.4717015856,-0.8594110709,0.578697806

6\C,-1.9867682467,0.815173249,0.2077380549\H,-0.041033887,-1.797730931

4,0.4086394793\H,1.8891783595,1.2771097775,0.7922278033\H,0.2622055995

,-0.2718703109,1.4636461208\C,-2.3040825451,-0.3359856988,-0.402666154

7\H,-2.1171134666,-0.4897668569,-1.4613493495\H,-2.8239770428,-1.13270

15476,0.1208735311\H,-1.5310478271,1.6396095007,-0.3329591996\H,1.9559

50517,1.3859883988,-0.9929476772\H,-2.2391764084,0.9955849241,1.248407

8576\H,3.229776892,0.5033843651,-0.1040593436\\Version=SGI-G94RevE.2\H

F=-211.4637446\MP2=-212.1517831\RMSD=1.419e-09\RMSF=3.867e-06\Dipole=1

.7277272,-0.6693773,0.005826\DipoleDeriv=-0.5766038,0.0423854,-0.01311

3,0.0044142,-0.2058693,-0.0078661,0.2300018,0.0304403,-0.2382014,0.269

7052,-0.083782,0.0104204,-0.1415332,0.2343509,0.0319056,-0.0280631,0.0

15329,0.3257886,0.236253,0.0818988,0.0284289,0.2078212,0.2911552,-0.02

70514,0.1120418,0.0181839,0.0696939,0.8833075,-0.1065499,-0.0428265,-0

.1600632,0.1623177,-0.0099105,-0.13458,-0.0472309,0.2467258,-0.4900703

,0.0679327,-0.1433956,-0.0836593,0.0539203,-0.0093555,-0.2883134,0.016

4116,0.0126434,0.1082874,-0.0019315,0.0186543,0.0104187,0.1424493,-0.0

190321,-0.0217616,-0.0157332,0.10614,0.0683634,0.0125363,0.0835005,-0.

0402296,0.0888032,0.026004,0.0391277,-0.0281719,0.0349048,0.1038706,-0

.0231805,-0.0152335,0.0289985,0.0754753,-0.0292848,-0.0303746,0.000913

2,0.1471224,-0.292092,0.1917052,-0.0424725,0.4407937,-0.1416645,0.0112

14,0.0235334,-0.004182,0.0728349,0.1290812,-0.0352163,0.0564952,-0.043

8105,0.0699623,-0.0158518,0.0496728,-0.0245936,-0.027724,0.1405984,-0.

0573003,0.0249642,-0.0612874,0.0293125,0.0234137,0.0339897,0.027552,0.

0324787,0.1158486,-0.0717767,0.0578042,-0.0686683,0.0139548,0.0172679,

0.0626818,0.0299505,0.0301437,0.0805457,0.0075601,-0.0495494,-0.070572

3,0.0797185,0.0032529,-0.0609917,0.0114949,0.0681744,0.1553119,-0.0247

42,0.0272434,-0.0355468,0.061368,-0.0090743,0.0315722,-0.0159491,-0.01

89532,0.0675932,0.0004607,-0.0009207,0.0129243,0.0447457,0.0143685,-0.

0185369,-0.0144147,0.1382281\Polar=55.3064289,6.7174692,47.4507038,-5.

6285298,2.8622547,43.0446552\PG=C01 [X(C4H10N1)]\NImag=0\\@

**2**

1\1\MF-ION\Freq\RMP2-FU\6-31G(d)\C5H12N1(1+)\THEIS\15-Dec-1998\0\\#N G

EOM=ALLCHECK GUESS=READ RMP2(FULL)/6-31G(D) FREQ\\Endepunkt af reverse

IRC paa meprmeimo ethylentabs TS. HF/6-31* gaet.\\1,1\N,0.9192040634,

0.12146357,0.1591025667\C,1.4867869731,-1.0035896933,-0.60794147\C,1.3

775648858,1.3161600344,0.0400648878\C,-0.2247135797,-0.1912159203,1.05

48066654\C,-1.9200351858,0.4522996892,-0.7330846744\H,0.1182549085,-0.

9844523206,1.7248930154\H,0.9342697311,2.1200405148,0.6170594404\H,-0.

4214402629,0.7065991923,1.644994196\C,-1.4598916665,-0.6058910522,0.26

17989729\H,-1.2899767095,-1.5666404487,-0.2331363752\H,-2.2415980513,-

0.7875624999,1.0065301141\H,-2.8584480785,0.1473351127,-1.1992526739\H

,-1.1960275543,0.607791621,-1.5384073519\H,-2.0956432685,1.4117459853,

-0.2377463284\H,2.2053421277,1.5139432311,-0.6324092625\H,1.7310064473

,-1.8025813141,0.0925777813\H,0.739663137,-1.3506652388,-1.3212511122\

H,2.381900568,-0.6723771719,-1.1314357001\\Version=SGI-G94RevE.2\HF=-2

50.5410599\MP2=-251.3749321\RMSD=3.842e-10\RMSF=4.939e-06\Dipole=1.319

0825,0.3541278,0.1469342\DipoleDeriv=-0.2376053,0.0212688,0.0326009,0.

0125873,-0.1352352,-0.0253223,-0.0064251,-0.0107935,-0.2081271,0.12818

28,-0.1352117,-0.0210123,-0.1270393,0.2041912,0.0932837,-0.0156851,0.0

812992,0.1454696,0.1229666,0.0438599,-0.0472138,0.0539398,0.1907246,0.

0030571,-0.0017746,0.0029928,0.1052332,0.3605825,0.0341074,-0.1115249,

0.0707969,0.0730893,-0.0217605,-0.1791934,-0.0887482,0.2384122,-0.0311

699,-0.0026138,-0.0710477,-0.0415563,0.0242903,-0.0041627,-0.0692455,0

.0074739,0.0317689,-0.0192196,0.0378423,-0.0521284,0.0312103,0.0549369

,0.0426502,0.0107163,0.035689,0.0709853,0.1037759,0.0149367,0.0533415,

0.0067658,0.1478701,0.0077694,0.0446855,-0.0110499,0.1129363,0.0300621

,-0.0337665,0.0133568,-0.0198777,-0.0336624,-0.0691177,0.0335433,-0.00

27806,0.0744815,0.0879109,-0.0180595,0.067182,-0.0081213,0.0911839,0.0

072069,0.1362161,0.0794052,0.0249269,0.0382416,0.0790572,-0.0133033,0.

0512882,-0.0497478,-0.0345713,-0.0381959,-0.0523363,0.0128728,0.002857

1,-0.0275048,0.0377827,-0.0005198,0.0777279,0.0249263,0.0113316,0.0191

79,-0.0013528,-0.0036373,-0.0214323,-0.0580101,-0.0344062,0.0764656,-0

.0037409,-0.0579593,0.0018551,0.0616355,-0.0379686,-0.0144587,0.127665

2,0.0097865,0.0267157,0.0265563,0.0821964,0.0318332,-0.0184829,0.08926

44,-0.0177104,-0.0066304,0.0260742,-0.0602424,-0.0348003,0.0149777,-0.

07715,0.0022152,0.134221,0.0180873,0.0316057,0.0267672,0.1204365,-0.03

7089,0.0464961,-0.0184027,0.1228796,0.1281141,0.0112979,0.0276088,0.00

12754,0.0800356,-0.0052241,-0.0132244,0.031088,0.0216072,0.0479811,0.0

179568,-0.0523998,0.0168491,0.0747707,0.0054144,-0.0241261,-0.0210482,

0.1028503,0.055441,-0.0076567,0.042127,-0.0758202,0.0364495,0.0249245,

0.0256664,-0.0085061,0.099688\Polar=57.2563719,4.5227342,59.6565803,-3

.8760388,0.1161886,47.8854125\PG=C01 [X(C5H12N1)]\NImag=0\\@

**complex2**

1\1\MF-ELECTRON\Freq\RMP2-FU\6-31G(d)\C5H12N1(1+)\THEIS\11-Dec-1998\0\

\#N GEOM=ALLCHECK GUESS=READ RMP2(FULL)/6-31G(D) FREQ\\G2(MP2) geom. g

aet fra HF/6-31*\\1,1\N,-1.1277999781,0.,0.2084264138\C,-1.6817471827,

1.2485153541,-0.3438981421\C,-1.6817471827,-1.2485153541,-0.3438981421

\C,-0.1862622542,0.,1.0831244466\C,2.4748806948,-0.6700925254,-0.23890

05178\H,0.192177688,0.9383406351,1.4684940723\H,-1.2121771501,-2.10293

80162,0.1397529725\H,0.192177688,-0.9383406351,1.4684940723\C,2.474880

6948,0.6700925254,-0.2389005178\H,2.089888003,1.2401205364,-1.07938104

03\H,2.9208776031,1.2389653343,0.5712524285\H,2.089888003,-1.240120536

4,-1.0793810403\H,-1.4859583921,-1.2647131993,-1.4170740677\H,2.920877

6031,-1.2389653343,0.5712524285\H,-2.7575221381,-1.2562446076,-0.16511

81941\H,-1.2121771501,2.1029380162,0.1397529725\H,-1.4859583921,1.2647

131993,-1.4170740677\H,-2.7575221381,1.2562446076,-0.1651181941\\Versi

on=SGI-G94RevE.2\State=1-A'\HF=-250.5031177\MP2=-251.3292452\RMSD=9.67

4e-10\RMSF=2.909e-07\Dipole=-1.4474871,0.,0.42926\DipoleDeriv=-0.45191

57,0.,0.0245046,0.,-0.2347321,0.,-0.0937025,0.,-0.1764248,0.1641383,-0

.1095406,-0.0104153,-0.2006393,0.2565927,-0.1060704,-0.0031431,-0.1146

572,0.131466,0.1641383,0.1095406,-0.0104153,0.2006393,0.2565927,0.1060

704,-0.0031431,0.1146572,0.131466,0.7110374,0.,-0.0041327,0.,0.0662012

,0.,-0.0359784,0.,0.1793461,-0.3718775,-0.0816834,0.1583537,-0.27623,-

0.0052272,0.0600146,0.2286858,0.0438366,0.0047185,0.1133926,0.0103531,

-0.0127844,-0.0103125,0.0743879,0.0095945,0.0210266,0.0247681,0.136495

,0.0628363,0.0523754,-0.0585683,-0.0068554,0.0562701,-0.0075968,-0.059

6984,0.0370301,0.058734,0.1133926,-0.0103531,-0.0127844,0.0103125,0.07

43879,-0.0095945,0.0210266,-0.0247681,0.136495,-0.3718775,0.0816834,0.

1583537,0.27623,-0.0052272,-0.0600146,0.2286858,-0.0438366,0.0047185,0

.1181107,0.0226224,-0.0859236,0.014297,0.0242717,0.0316458,-0.0881006,

0.0431577,0.0113872,0.1485587,-0.0178838,-0.0510396,-0.0146325,0.03328

34,-0.0264958,-0.0653066,-0.0324193,0.0152306,0.1181107,-0.0226224,-0.

0859236,-0.014297,0.0242717,-0.0316458,-0.0881006,-0.0431577,0.0113872

,0.094979,-0.0182197,0.0401873,-0.0727147,0.0674014,0.0414452,0.004534

2,0.0035284,0.0407944,0.1485586,0.0178838,-0.0510396,0.0146325,0.03328

34,0.0264958,-0.0653066,0.0324193,0.0152306,0.0403011,0.0007961,0.0100

044,0.0298843,0.0772853,-0.0499684,0.0268425,-0.0244598,0.0997137,0.06

28363,-0.0523754,-0.0585683,0.0068554,0.0562701,0.0075968,-0.0596984,-

0.0370301,0.058734,0.094979,0.0182197,0.0401873,0.0727147,0.0674014,-0

.0414452,0.0045342,-0.0035284,0.0407944,0.0403011,-0.0007961,0.0100044

,-0.0298843,0.0772853,0.0499684,0.0268425,0.0244598,0.0997137\Polar=62

.2286547,0.,60.6240618,9.6276495,0.,50.1492883\PG=CS [SG(C1N1),X(C4H12

)]\Nimag=0\\@

**3**

1\1\GINC-PC\Freq\RMP2-FU\6-31G(d)\C5H12N1(1+)\TIS501\28-Jun-2000\0\\#N

GEOM=ALLCHECK GUESS=TCHECK RMP2(FULL)/6-31G(D) FREQ\\Trans pretim\\1,

1\N,0.6375653438,-0.1240381889,0.4938049147\H,1.5763444616,-0.02627644

45,0.0940504951\C,0.2097383364,0.8270754653,1.249947874\C,-0.107938361

9,-1.3385233892,0.1019807484\C,-0.3837808539,-1.336330553,-1.397208381

8\C,-1.2803600693,-0.1884923267,-1.8444125793\H,0.5048771506,-2.191600

8666,0.405431275\H,-0.7921358906,0.7030495777,1.6578421352\H,-1.033117

0517,-1.3459257219,0.6832667013\H,0.5657860719,-1.3287751504,-1.944512

2315\H,-0.8563502187,-2.2971162558,-1.6245879894\H,-0.8102210742,0.786

8948288,-1.6903274304\H,-2.234200278,-0.2014712967,-1.309210187\H,-1.4

997786344,-0.2748295245,-2.90994002\C,0.9945048433,2.0335784683,1.5794

319958\H,0.4349184304,2.9217065203,1.2675936748\H,1.1090601906,2.09993

55716,2.6665452423\H,1.9788760691,2.038830096,1.1087759895\\Version=SG

I-G98RevA.7\HF=-250.5589046\MP2=-251.3882833\RMSD=9.984e-10\RMSF=1.494

e-05\Dipole=0.6984913,0.4009557,1.0587185\DipoleDeriv=-0.1816056,0.071

0755,0.0462707,-0.0773691,-0.4198985,-0.1038249,-0.1106772,-0.1816189,

-0.3825117,0.2751591,-0.0737805,-0.0158535,-0.0434951,0.1820478,-0.039

9238,0.0255488,-0.0056617,0.2866174,0.2717204,0.1025543,-0.0213668,0.1

163686,0.674014,0.2987967,0.0139823,0.2863196,0.349568,0.2192745,0.216

6354,0.1223209,0.1260584,0.3982895,0.1550136,0.0621974,0.0095333,0.188

5471,0.0880922,-0.0819549,-0.0147574,-0.0415623,-0.0549458,-0.0654937,

0.0190315,0.0435839,0.1781754,0.0460954,0.0390864,-0.0153286,0.018999,

0.0525986,-0.0124262,-0.0492819,0.000542,-0.0787792,0.0200076,0.004743

4,-0.0950381,-0.0052374,0.0218869,-0.0245427,-0.0515911,0.0186379,0.04

4412,0.0643032,-0.0446926,-0.0056178,-0.0697952,0.0716026,0.0111618,-0

.016873,-0.0078166,0.1305267,0.017547,-0.0177699,0.0383725,0.0398803,0

.0423587,-0.0897226,0.0505167,-0.0325112,0.0143342,-0.0929567,0.030053

6,0.0497595,0.0061946,0.0741122,0.0455819,0.0062955,0.024442,0.0142699

,0.0604515,-0.0467222,-0.0324187,-0.0198671,-0.0231744,0.0108774,-0.02

54033,-0.0265218,0.0260909,-0.01064,-0.0770577,-0.0192874,-0.040025,-0

.1026809,-0.0223922,-0.0203528,-0.0583234,0.0794997,-0.0316566,0.01621

51,0.0576905,0.002025,0.0384748,0.0250539,0.1141262,0.0080167,0.020393

1,0.0850242,0.012239,-0.0312094,0.0132001,0.0799506,-0.0067034,-0.0400

498,-0.002177,-0.0405797,-0.0229781,-0.0297739,-0.0206902,-0.0739938,-

0.3366391,-0.159964,-0.0557426,-0.1513005,-0.1292087,0.0513768,-0.0336

712,-0.0683463,0.0104819,0.1177737,0.0021387,-0.0157548,0.0470134,0.14

00431,0.1116908,-0.0787121,-0.0101429,-0.0128471,0.1167525,0.0284925,0

.0201086,0.0481324,0.0914063,0.0290943,-0.0084676,0.035643,0.0509842,0

.0674767,-0.0521229,0.0739196,-0.0202899,0.0671956\Polar=50.8270371,2.

7019178,63.7992528,1.4439697,12.17598,56.5347507\PG=C01 [X(C5H12N1)]\N

Imag=0\\@

**Complex3**

1\1\GINC-PC\Freq\RMP2-FU\6-31G(d)\C5H12N1(1+)\TIS501\28-Jun-2000\0\\#N

GEOM=ALLCHECK GUESS=TCHECK RMP2(FULL)/6-31G(D) FREQ\\kompleks mellem

trans forb. og ethylen\\1,1\N,0.6052571578,-0.0746375614,0.7436739841\

H,1.5954139428,-0.3311537509,0.7886886816\C,0.2882142869,1.3404019803,

1.0307696711\C,-0.2400783849,-0.9902695944,0.4328953583\C,-0.334065635

6,-1.6187088735,-2.5116637149\C,-1.18669294,-0.5898885497,-2.401942744

6\H,0.099927697,-2.0039449413,0.2606435442\H,-0.7921820124,1.451028343

4,0.9216487821\H,-1.2961638943,-0.7532584357,0.4010637782\H,0.72011471

81,-1.4649368666,-2.7223423471\H,-0.6755806893,-2.648184449,-2.4616539

896\H,-0.8568277219,0.4381825526,-2.5199737378\H,0.7804831269,1.931751

7386,0.2541950669\H,-2.25196836,-0.7464340471,-2.260884864\C,0.7694251

702,1.7184411175,2.4212608607\H,0.5368819049,2.770187784,2.599290806\H

,0.2713458642,1.1221072326,3.1875405057\H,1.8509403394,1.5972612877,2.

5181493018\\Version=SGI-G98RevA.7\HF=-250.504788\MP2=-251.3289416\RMSD

=2.233e-09\RMSF=6.732e-06\Dipole=0.4749188,-0.2519691,1.0247278\Dipole

Deriv=-0.2820527,-0.1667201,-0.2597418,-0.0570976,-0.3063338,-0.212216

9,-0.0716977,-0.114654,-0.4647703,0.3165943,0.0222997,0.0378784,-0.041

2331,0.1584878,-0.0531141,-0.0080885,-0.0034707,0.3217932,0.0916123,-0

.1144601,-0.0765689,0.0285044,0.494053,0.2007014,0.0011232,0.08457,0.2

742385,0.3305866,0.1966953,0.2850589,0.0982094,0.2304822,0.1536411,0.2

03595,0.1973097,0.6768048,-0.034028,-0.0120003,-0.2809755,0.1012992,0.

0892466,0.203932,-0.1695537,-0.0012346,-0.4109114,0.0892453,0.0681001,

0.1064922,-0.0231475,-0.0340278,-0.2504155,-0.0595848,-0.1696359,-0.48

79992,0.0957603,0.0040167,0.0113951,-0.0013823,0.1346733,-0.0082084,-0

.0126723,-0.021148,0.1209911,-0.0188113,-0.0054948,-0.0330587,-0.07920

91,0.0335243,-0.0452665,-0.0460397,-0.0161244,0.0590246,0.1334534,0.01

96261,0.0046915,0.0624813,0.0938354,0.0247324,-0.014334,-0.0223099,0.0

941385,-0.03775,-0.0163096,0.0284351,-0.0293151,0.0440705,-0.0008397,0

.0257423,0.0038372,0.1639647,0.052224,-0.0250571,0.0313464,-0.0201842,

-0.0103093,0.0148382,0.0364094,0.0243419,0.1583402,0.0316294,-0.041730

3,0.0119787,-0.0287659,-0.0413712,0.0051141,0.0130351,0.0115218,0.1694

475,0.0874972,0.0227992,0.0703484,-0.0136132,0.0243298,-0.0562191,0.02

52954,0.0059045,-0.0056835,-0.0148421,-0.0040867,0.0400588,-0.0133175,

0.0521907,0.0146774,0.0455268,0.0256284,0.1587986,0.0759988,0.0647055,

0.0298819,-0.0135626,-0.1121585,-0.0646118,0.0187534,0.0148368,0.04950

62,0.0954335,0.0231904,-0.0182175,0.0215681,0.0068116,-0.0170257,-0.02

90832,-0.0209424,0.0612169,0.0387265,-0.0591253,0.0252144,-0.0517354,0

.0409452,0.0781674,0.0049844,0.0155288,0.0172904,-0.0512774,0.0235511,

-0.0142175,0.0605009,0.1015501,0.0121135,0.0365888,-0.0139593,0.043809

2\Polar=56.9191448,2.2099582,65.5046896,5.971438,11.1386969,55.3911642

\PG=C01 [X(C5H12N1)]\NImag=0\\@

**4**

1\1\GINC-PC\Freq\RMP2-FU\6-31G(d)\C5H12N1(1+)\TIS501\15-Dec-1998\0\\#N

GEOM=ALLCHECK GUESS=READ RMP2(FULL)/6-31G(D) FREQ\\endepunkt af IRCf,

HF/6-31* gaet. IMMON\\1,1\C,1.2489262104,0.5431338852,-0.2054166951\C

,-0.190301641,0.5213898783,0.3050696394\N,-0.9111139646,-0.5842236893,

-0.3768984297\H,-1.0203078283,-0.4780153706,-1.3919665669\C,-1.3913792

866,-1.6403981224,0.1697892852\C,2.0328248198,-0.7316755264,0.08332172

21\C,-0.9547133318,1.8118234068,0.0494057147\H,-1.2894186557,-1.775838

3269,1.2412926839\H,-0.2073405192,0.2642861581,1.3695679949\H,1.245068

1342,0.7687955439,-1.2791909878\H,1.7299940766,1.3975888624,0.28161970

93\H,3.0719132895,-0.6107421996,-0.2278772793\H,1.6349973901,-1.596060

656,-0.455587735\H,2.0345008751,-0.9608869813,1.1527895249\H,-1.894457

4527,-2.3840383015,-0.4391551429\H,-0.45383233,2.6255829116,0.57801137

39\H,-0.9619228383,2.0608956331,-1.0157209518\H,-1.9835370145,1.752357

4223,0.411488387\\Version=SGI-G94RevE.2\HF=-250.5430479\MP2=-251.37648

61\RMSD=6.157e-10\RMSF=4.680e-06\Dipole=-1.3665653,-1.0390273,-0.22581

14\DipoleDeriv=0.1218382,-0.0214975,-0.0134101,-0.0481954,-0.0617462,-

0.0262791,-0.0638517,-0.1011989,0.0945395,0.2829364,0.092767,0.0391718

,0.1197149,0.3922241,0.0854196,0.0886447,0.201042,0.156338,-0.2588509,

0.0413934,-0.0161851,0.0339054,-0.241445,-0.0360673,0.0821908,0.078437

,-0.1745023,0.2840934,-0.0553858,0.027449,-0.0478688,0.2075225,0.02916

8,-0.0131617,-0.0369385,0.2909702,0.1480562,0.0476072,0.0097724,0.0548

54,0.1972967,-0.0310606,-0.0356205,-0.0914077,0.250871,-0.0763486,0.04

54704,0.0271476,-0.0182685,0.0553748,0.0211013,0.0515106,0.0168303,0.0

57893,-0.0663809,-0.0549482,-0.0158752,-0.04518,-0.0496172,-0.0263017,

-0.0476091,-0.1035398,0.0551734,0.1317085,-0.0101565,-0.0423677,-0.012

6871,0.1293866,-0.0644806,-0.0276785,-0.0343089,0.1154884,0.0375162,-0

.0275658,0.0175081,-0.0301334,-0.0248241,0.0923079,-0.0028796,0.024339

3,-0.0143031,0.0185269,0.0507356,-0.0643595,0.0378767,0.0540021,0.0266

244,-0.0080148,0.0463378,-0.0784163,0.0298348,-0.0345562,0.0021857,-0.

000251,-0.0129306,-0.0430243,0.0000828,-0.0429332,0.0552058,-0.0373995

,0.0095104,0.0322876,-0.0006329,0.068109,0.0117108,0.0401238,0.0087134

,0.0911108,0.0330776,-0.0863575,-0.0720081,-0.0234267,-0.0711657,-0.04

25213,-0.0561648,-0.0565962,0.0124364,0.082272,-0.0037191,0.0530888,0.

0232258,0.031715,0.0112095,-0.0009431,0.0372082,-0.0846538,0.1801534,-

0.013148,-0.0035945,-0.0154363,0.1508525,0.0161013,-0.0060694,0.014336

,0.0923769,0.0669593,-0.0275853,-0.0496026,-0.0314544,0.0380201,-0.013

8566,-0.0377829,-0.0171725,0.0737495,0.0730966,0.0207872,0.0315255,0.0

248661,0.0814068,-0.0409984,-0.0018089,0.0281047,-0.0652873,-0.0510895

,0.0266487,0.0372662,-0.0209085,0.0558187,0.0309472,0.0390323,0.028747

,0.0710099\Polar=55.0084703,5.9198737,62.7191187,-0.4768067,-2.3402874

,49.7492811\PG=C01 [X(C5H12N1)]\NImag=0\\@

**complex4**

1\1\GINC-PC\Freq\RMP2-FU\6-31G(d)\C5H12N1(1+)\TIS501\12-Dec-1998\0\\#N

GEOM=ALLCHECK GUESS=READ RMP2(FULL)/6-31G(D) FREQ\\endepunkt af IRCr

(kompleks\\1,1\N,-1.4101490916,-0.3358082479,-0.2790230844\H,-1.946701

2953,-0.0639259306,-1.1069289094\C,-1.3742113493,-1.7705524829,0.03518

55089\C,-0.8100627078,0.5952796112,0.3782759077\C,2.2115150206,-0.8809

668854,0.0922778481\C,-0.8797829615,2.0239233486,0.014773411\H,-0.7666

901956,-1.921562925,0.9252356706\H,-0.2431904605,0.2843822769,1.250847

785\C,2.4197981478,0.4078759308,-0.2040321402\H,2.3701209017,0.7720635

474,-1.2256735762\H,2.7133923138,1.1254179012,0.5562704099\H,1.9875351

165,-1.6120803232,-0.6787381569\H,-0.9388887873,-2.300223137,-0.812392

9728\H,2.3289992044,-1.2592059964,1.1034626054\H,-2.3937657866,-2.1155

403263,0.20818276\H,0.1376484147,2.4021260806,-0.1213401108\H,-1.46044

98075,2.2027954426,-0.89158621\H,-1.3205028769,2.5830539915,0.84693908

22\\Version=SGI-G94RevE.2\HF=-250.5187772\MP2=-251.341569\RMSD=6.788e-

10\RMSF=1.119e-06\Dipole=-1.8469665,0.0590211,-0.066201\DipoleDeriv=-0

.369981,-0.147169,-0.0002473,-0.0513891,-0.4692279,-0.006142,-0.037989

7,-0.1520493,-0.2260154,0.3354533,0.0126375,0.0057309,-0.0164961,0.143

6245,0.0233295,0.0089874,0.0517627,0.3027532,0.1354359,-0.0521453,-0.0

45563,0.0483126,0.3955371,-0.0231401,-0.0639894,-0.1192695,0.0890911,0

.4531435,0.1114309,0.0783803,0.0751052,0.765071,0.0756177,0.0826259,0.

0897135,0.2244679,-0.4074583,-0.0311316,0.0792098,-0.0620967,0.013794,

0.0155139,0.1181823,0.0173832,0.0613558,-0.0700868,-0.0707719,0.0179,-

0.0320994,-0.3879412,-0.0299559,0.0188741,-0.0748998,-0.0171725,0.0859

052,0.0142041,-0.0628141,-0.0489306,0.055295,-0.064673,-0.0596741,-0.0

0728,0.0484559,0.1267434,0.0022954,-0.0180707,0.0303776,0.029682,0.057

0234,-0.0177661,0.0293593,0.1123709,-0.3312512,0.1518228,0.0326055,0.2

195146,-0.0571657,0.0038885,0.0345917,-0.0012443,0.0777416,0.154874,-0

.0220293,-0.0364269,-0.0270068,0.0424803,0.0276668,-0.0375253,0.035691

9,-0.0317195,0.1656646,-0.0334733,-0.0127267,-0.0366819,0.0158997,-0.0

363749,-0.0166407,-0.0422696,-0.0004707,0.1473686,-0.0404482,-0.049433

9,-0.0375066,0.0037196,-0.0378115,-0.0513394,-0.0478499,-0.0041143,0.1

189393,0.0387106,0.041798,-0.0211456,0.0424712,0.0235286,0.0569613,0.0

240769,0.0479,0.1696061,-0.0117321,-0.0054284,-0.0179095,0.0401692,0.0

228816,-0.0102243,0.0315224,-0.0329508,0.0385828,0.004318,0.0184053,0.

0327371,0.0486633,-0.0073405,0.0070246,0.0311005,0.1311457,0.050822,0.

0221021,0.0017566,-0.0087981,0.1363297,-0.0013071,-0.005891,0.0649877,

0.1263937,0.0709505,0.0058413,-0.0645015,-0.0384002,0.0710418,-0.05274

59,-0.0605514,0.0125611,0.0244795,0.1252882,0.0455379,0.0194262,-0.007

5866,0.1105564,0.0100409,0.034344,0.0567032,0.066288\Polar=47.2656747,

6.6322186,72.335346,4.9244424,1.0544281,48.7942985\PG=C01 [X(C5H12N1)]

\NImag=0\\@

**5**

1\1\GINC-PC\Freq\RMP2-FU\6-31G(d)\C5H12N1(1+)\TIS501\16-Dec-1998\0\\#N

GEOM=ALLCHECK GUESS=READ RMP2(FULL)/6-31G(D) FREQ\\ibumeimo, endepunk

t af reverse IRC paa ibumeimo propen tabsTS. start fra HF/6-31*\\1,1\N

,1.2917145761,-0.4875176663,-0.1369978712\H,1.0948182995,-1.2597301096

,-0.781091656\C,2.317548093,0.2445011898,-0.3762801354\C,0.3265847129,

-0.3055210483,0.9667359419\C,-1.0327402348,1.4412317906,-0.257647308\H

,0.2968351735,-1.2576915773,1.5046498808\H,2.5471516061,1.0710175184,0

.2878693076\H,0.736670391,0.4644846747,1.6248593056\C,-1.0537469046,0.

0775685744,0.4254099532\C,-1.6347094358,-1.0101389886,-0.4762986093\H,

-1.679227841,0.1478693189,1.3239248949\H,-2.0478195929,1.7371727155,-0

.5303687007\H,-0.4451821763,1.4229320403,-1.1814669433\H,-0.6283928537

,2.2177455208,0.3987173432\H,2.9452944927,0.0295891733,-1.2344557977\H

,-2.6735799827,-0.7765089887,-0.7177539959\H,-1.103939065,-1.077581099

,-1.4331507829\H,-1.6222478681,-1.9925246305,0.0057331888\\Version=SGI

-G94RevE.2\HF=-250.5384321\MP2=-251.3717157\RMSD=7.241e-10\RMSF=8.959e

-06\Dipole=2.0796755,-0.322083,-0.1785019\DipoleDeriv=-0.2633915,0.041

5468,0.0064327,-0.03286,-0.2073957,0.0127735,-0.1243224,-0.0139816,-0.

1794795,0.2883951,-0.0445609,0.0338278,-0.0193309,0.3188928,0.0175992,

0.0950784,0.0347059,0.2230578,0.2463294,0.0647879,-0.0402114,0.0980041

,0.2181522,0.0343697,0.0267794,0.0457984,0.178633,0.2146207,-0.0547205

,-0.0752506,-0.0775947,0.09287,0.0239716,-0.2371226,-0.0209991,0.27795

71,-0.0651501,0.0254553,-0.0579324,-0.0008365,-0.016312,0.0331842,-0.0

589512,-0.0008867,0.0582968,0.0500269,0.0381688,0.0132903,0.060931,0.0

053582,0.0333008,0.0666994,0.0021284,0.0766484,0.1469392,0.0344719,0.0

498309,0.0223568,0.1466487,-0.0097963,0.0250305,-0.0309844,0.0890845,-

0.0234758,-0.0730645,-0.03952,-0.0553794,0.0311116,-0.0584383,0.032864

5,-0.0098169,0.0703904,0.2358366,-0.0077669,0.0600384,-0.0297783,0.126

4728,-0.014565,0.1753515,0.0168742,0.0011283,-0.0607623,0.0052461,-0.0

824038,0.044921,-0.0048087,-0.0125097,-0.06082,0.010039,0.0628181,-0.0

141226,-0.0070338,0.0378727,0.0124297,0.0381163,-0.0018675,0.0014559,-

0.0010605,-0.0409872,-0.0304718,0.0384252,-0.0341769,0.0159876,0.07940

49,0.0187235,-0.0349063,0.0269012,0.079298,0.0062206,-0.0126442,0.1141

873,0.0259599,0.0267116,-0.0438732,0.0850215,0.0073348,-0.0527298,0.04

72373,-0.0869029,-0.0510171,-0.0465117,-0.0213742,-0.0338128,-0.042365

8,-0.0654605,-0.008405,0.163712,-0.0216163,-0.0106094,-0.0330197,0.124

4586,-0.0354516,0.0055069,-0.031095,0.1349945,-0.0247254,0.0182613,-0.

0360864,0.0491576,0.079,-0.002427,-0.0283301,-0.0109823,0.0764482,-0.0

108827,0.00655,0.1328106,-0.0293387,0.0383483,0.0018253,0.0840623,-0.0

238497,-0.062655,0.0936644,0.0353967,-0.0210828,-0.0050979,-0.0756554,

0.0369935,-0.0110319,0.0653348,0.0155013\Polar=64.1042754,5.8813546,52

.3494389,-4.2507022,0.8278199,49.836247\PG=C01 [X(C5H12N1)]\NImag=0\\@

**complex5**

1\1\MF-ELECTRON\Freq\RMP2-FU\6-31G(d)\C5H12N1(1+)\THEIS\05-Jul-2000\0\

\#N GEOM=ALLCHECK GUESS=READ RMP2(FULL)/6-31G(D) FREQ\\nyt gaet paa ko

mplex\\1,1\N,0.3588531346,-0.0267495601,1.5756944233\H,1.2727698761,-0

.4837427489,1.6002146271\C,0.3170333746,1.3773580986,2.0046461678\C,-0

.6396538137,-0.7003237092,1.1216176797\C,-0.1785302695,-0.7235506326,-

1.7181004581\C,-1.2930188175,0.0034927043,-1.5229314652\H,-0.507234400

9,-1.7400117708,0.8513535752\H,-0.7115034482,1.7307005083,1.9553780005

\H,-1.6261450285,-0.2543146703,1.1146783768\C,1.208220259,-0.165268481

2,-1.697386709\H,-0.2768539849,-1.7829824274,-1.9551752206\H,-1.245819

6927,1.0776025539,-1.3570532709\H,0.9521530089,1.9638949128,1.33993794

33\H,-2.2821180059,-0.4343018795,-1.6169430506\H,0.6887650029,1.440142

0964,3.0274525016\H,1.6800643469,-0.284359231,-2.6772453454\H,1.207692

2177,0.9009220972,-1.4543407009\H,1.8519537694,-0.696550399,-0.9851896

911\\Version=SGI-G94RevE.2\HF=-250.5031907\MP2=-251.330623\RMSD=1.415e

-09\RMSF=2.247e-06\Dipole=0.1268387,-0.1426355,1.9390509\DipoleDeriv=-

0.3114059,-0.1145805,-0.438221,-0.0330241,-0.2512113,-0.18064,-0.07479

26,-0.0317826,-0.5515179,0.3090027,-0.011317,0.0428608,-0.0498424,0.16

01671,-0.1113191,0.0131036,-0.0611091,0.3421501,0.0441471,-0.0523301,-

0.0752637,0.0505206,0.3622508,0.1886453,0.012971,0.065471,0.2209535,0.

3151987,0.1267717,0.4290505,0.0636121,0.1617501,0.0792471,0.1831205,0.

0811665,1.0350906,0.1722111,-0.0190239,-0.4677409,0.1262193,0.0846336,

0.3025098,-0.1334643,0.0738504,-0.3001604,-0.0335962,0.0486611,0.33179

84,-0.0040558,0.0496251,-0.1272334,0.0470191,-0.0201927,-0.6419462,0.0

898988,0.0245806,0.0204467,0.0152852,0.1347386,-0.0010484,-0.0226577,-

0.0191575,0.0733517,0.0019581,0.0156801,-0.0129197,-0.0629455,0.077098

7,-0.025008,-0.0481081,0.0008051,0.1081647,0.1508285,0.0049689,0.00795

04,0.0330226,0.0827975,0.0356318,-0.0060137,-0.0176209,0.0594956,-0.09

15875,-0.0360796,0.1022052,-0.0116999,0.0299585,-0.0748327,0.119689,-0

.0298481,0.0266223,0.0228184,-0.0195085,0.0111324,-0.0317127,-0.041644

5,-0.0273014,0.0194382,-0.0171409,0.1381758,0.0451465,-0.0437041,-0.01

25776,-0.015597,-0.0431259,-0.0462064,-0.0066406,-0.0428964,0.1598216,

0.0954797,0.0093544,0.0660176,-0.0101794,0.0593451,-0.0617431,0.045258

7,0.0228245,0.0505492,-0.0020953,-0.0255493,0.0060389,-0.0292329,0.043

0077,-0.0136858,0.0035801,-0.0050665,0.1697136,0.1279474,0.0232544,-0.

0140202,0.0010892,0.053065,0.012054,-0.0245886,-0.0072791,0.0572394,0.

0473534,0.0040545,0.0363486,-0.0276606,0.1115642,-0.0089489,0.0401223,

-0.0124255,0.0176191,0.0305936,0.0424209,0.0082884,-0.0185411,-0.08577

43,-0.037528,-0.0265907,-0.0698788,0.0663409,-0.0138991,0.0223464,-0.0

41395,0.0047426,0.011754,0.0974074,-0.1414463,0.0902806,-0.0316636\Pol

ar=62.8955283,0.5041655,55.312,3.83451,8.2073725,63.0799511\PG=C01 [X(

C5H12N1)]\NImag=0\\@

**6**

1\1\GINC-PC\Freq\RMP2-FU\6-31G(d)\C5H12N1(1+)\TIS501\29-Jun-2000\0\\#N

GEOM=ALLCHECK GUESS=TCHECK RMP2(FULL)/6-31G(D) FREQ\\reaktiommonium i

on\\1,1\N,1.1006870455,-0.6053698225,-0.9624145402\H,2.0672383533,-0.5

860531588,-0.6198492573\C,0.3848675617,0.6887470955,-0.9417740993\C,0.

3390800709,1.2361634427,0.4807311748\C,-0.3836068731,0.3359381546,1.48

24186361\C,0.6217730462,-1.7352405293,-1.3353058794\H,0.934242872,1.35

39261365,-1.6139896394\H,-0.3996727258,-1.786087688,-1.6968668052\H,-0

.6078866732,0.5099188972,-1.3575147995\H,1.3606276388,1.4495499236,0.8

184546135\H,-0.167491774,2.2056515389,0.4168712817\H,-0.3369059921,0.8

279626822,2.4582188101\H,0.1598409831,-0.6093016382,1.6060297137\C,-1.

8418574756,0.0621146504,1.1279357519\H,1.2403419575,-2.6250806477,-1.2

8859827\H,-2.3313467713,-0.4978853853,1.9272237777\H,-2.3934336524,0.9

962647256,0.9908279286\H,-1.9519015149,-0.527613512,0.2120609229\\Vers

ion=SGI-G98RevA.7\HF=-250.5368963\MP2=-251.3682431\RMSD=1.899e-09\RMSF

=4.933e-06\Dipole=1.3399432,-1.1726903,-1.4788885\DipoleDeriv=-0.18217

6,-0.0667216,-0.0279273,0.0341346,-0.1895311,-0.0144327,0.0389772,-0.0

770135,-0.2610615,0.3322105,0.0444678,-0.0059733,-0.0040978,0.171598,-

0.0180762,-0.0359513,0.0163699,0.3084365,0.1856639,-0.2088043,-0.06270

69,-0.125492,0.3386298,0.0728435,-0.0365194,-0.0292157,0.1312174,0.052

6097,0.0781769,0.019312,0.0228447,-0.0156122,0.0354109,-0.0232484,0.09

9253,0.1601406,0.1136153,-0.0276107,-0.0338129,-0.0022605,0.0892712,-0

.0745318,-0.01528,-0.0392906,0.0139081,0.2277655,0.0602152,0.0653663,0

.0119781,0.2344286,0.0277533,0.0321644,0.0669634,0.1550644,0.0447401,0

.0331453,0.0923718,0.0222478,0.0515753,-0.0240868,0.0453169,0.0205234,

0.040872,0.1101963,0.0349617,-0.0025787,0.06466,0.1178116,0.029774,-0.

0003407,0.0152367,0.1635292,0.0279362,0.0008065,-0.0406949,-0.0583709,

0.0007167,-0.0813984,-0.0419804,-0.0344802,0.0885018,-0.1095203,-0.050

8436,-0.0151379,-0.0101876,0.08698,0.0130305,0.0244941,0.003967,0.0039

491,0.0621053,0.0698275,-0.0029584,0.0357784,-0.0017776,0.0197007,0.00

90463,-0.0163598,0.0154996,0.0362944,-0.0189456,0.0100514,-0.0303554,0

.0447401,-0.0472396,-0.0030629,-0.0477295,-0.050892,-0.0754447,0.07573

22,-0.0014008,0.0662096,-0.109095,0.0444514,0.0196833,-0.0008636,0.068

3011,-0.0144161,-0.0234477,0.0121757,-0.0465394,0.0439329,0.0622065,0.

0298289,0.0513584,0.0518547,0.1065631,-0.0082982,-0.0310508,-0.0107721

,0.152569,-0.0081126,-0.02979,0.0081119,0.1691351,0.0267819,-0.0347144

,0.0351139,-0.0491545,0.0482614,0.0559547,0.0547687,0.0540137,0.002684

4,0.0295785,0.0242405,-0.0203657,0.0769268,-0.0565871,0.0159668,-0.038

0821,0.022333,0.0679912,0.0254964,0.0178124,0.0102166,0.00245,-0.00791

15,-0.1092141,-0.0300246,-0.1131776,-0.1291318\Polar=53.0174006,0.7267

926,62.1420256,-0.8773247,5.7512659,50.0361287\PG=C01 [X(C5H12N1)]\NIm

ag=0\\@

**complex6**

1\1\GINC-PC\Freq\RMP2-FU\6-31G(d)\C5H12N1(1+)\TIS501\29-Jun-2000\0\\#N

GEOM=ALLCHECK GUESS=TCHECK RMP2(FULL)/6-31G(D) FREQ\\kompleks\\1,1\N,

1.0977403416,-0.7809830609,-1.4239702548\H,2.0050416006,-0.4435637982,

-1.7529320854\C,0.1370284683,0.0696219145,-1.3291042125\C,0.3341383804

,1.6349739034,1.0127052998\C,-0.5216834642,0.7008606177,1.4641987704\C

,1.0266254116,-2.1959523177,-1.0365135953\H,0.2900057105,1.0898207376,

-1.6569916639\H,0.0039111595,-2.4310867182,-0.7470267062\H,-0.84431371

85,-0.2646735777,-1.0179360861\H,1.4080261781,1.5304429964,1.136357869

\H,-0.0219998674,2.5750584338,0.5979165426\H,-0.117095304,-0.193463450

5,1.939997615\H,1.7059903118,-2.3628443305,-0.199761689\C,-2.012576463

,0.825849557,1.4298169518\H,1.3274533616,-2.805634507,-1.888507778\H,-

2.4865354507,-0.0324347135,0.9396882179\H,-2.4089496121,0.8528806451,2

.4493872036\H,-2.3269107585,1.7402576594,0.9209810589\\Version=SGI-G98

RevA.7\HF=-250.5037657\MP2=-251.3299373\RMSD=1.308e-09\RMSF=3.324e-06\

Dipole=1.0943294,-0.9780191,-1.8147506\DipoleDeriv=-0.3682272,0.305783

1,0.2826841,0.1215825,-0.4340361,-0.2819094,0.0762422,-0.1319874,-0.40

79009,0.3427525,-0.0122629,-0.0491758,0.0490365,0.1372016,-0.0028243,-

0.0398683,0.053058,0.3489488,0.3626441,-0.3055042,-0.2558333,-0.239705

8,0.4804523,0.4495929,-0.2513577,0.4393221,0.741012,-0.1364212,0.10279

58,0.2761717,-0.0576194,0.0726365,0.0066968,0.2583838,-0.3024321,-0.60

32556,0.3449483,-0.1281139,-0.2914364,0.0488272,-0.213502,-0.414386,-0

.0442951,-0.2044124,-0.1139449,0.0311935,0.0839064,0.0489517,-0.069072

6,0.4310218,0.0510815,0.0270112,-0.0750291,0.1460072,0.1087428,-0.0192

919,-0.015114,0.0123655,0.1163523,-0.0208358,0.0280027,-0.0389904,0.10

32158,0.0007919,-0.004856,0.0248012,0.0787164,0.0713374,-0.0071383,0.0

112763,0.023902,0.1071568,0.1368121,-0.0314644,-0.0301852,-0.0433993,0

.0761039,0.0318423,0.0292919,-0.0183298,0.0714896,-0.0500514,0.0110634

,-0.0065714,0.0198299,0.0632227,0.0446751,-0.0144686,0.0469927,0.15446

14,0.0355471,0.0406064,-0.0351886,0.0133,0.0330967,0.071491,-0.0424047

,0.0793179,0.1276475,-0.0203128,0.0501456,-0.0129342,0.0539841,-0.0195

616,0.0761595,-0.0126909,0.0739471,0.1041435,0.101498,-0.0424654,-0.05

21055,-0.0131304,0.0332142,-0.0555965,-0.0484147,0.0304739,0.0827618,-

0.103821,0.0049962,0.0518414,-0.0246418,0.0693531,0.0781613,0.1135708,

0.0385163,-0.0064791,0.1348773,-0.0122605,0.0200106,0.0153588,0.058271

3,0.0125003,0.0140237,-0.0051737,0.0519624,0.011651,-0.0227965,0.00051

33,-0.0364005,-0.0519669,-0.0911808,-0.0855432,-0.0856423,0.0495101,0.

0279495,-0.0059019,0.0373975,0.0270097,0.1095132,-0.0091172,0.0259264,

-0.0021899,-0.0008187,0.0394256,-0.0143793,0.0061727,0.0439592,-0.0327

103,0.0607878,-0.0446858,0.0786574,0.0440822\Polar=63.2274454,-5.06641

82,65.66145,-10.499834,4.8265243,55.2697533\PG=C01 [X(C5H12N1)]\NImag=

0\\@

**7**

1\1\MF-ELECTRON\Freq\RMP2-FU\6-31G(d)\C6H14N1(1+)\THEIS\26-Jan-1999\0\

\#N GEOM=ALLCHECK GUESS=READ RMP2(FULL)/6-31G(D) FREQ\\ipentmeimo, con

former. endepunkt af IRCf\\1,1\N,1.8884928556,-0.3203522348,-0.3065491

246\H,1.9415190233,-1.0568377855,-1.0183443553\C,1.0693606819,-0.63564

85514,0.8839587651\C,-0.3490962685,-0.9964334855,0.4584513725\C,-1.099

0605667,0.0936812953,-0.3119703165\C,2.5056087815,0.7798804757,-0.5378

753977\H,1.5658042921,-1.4723152091,1.384477421\H,2.4615302793,1.57807

92915,0.1952638787\H,1.1078441693,0.2372563789,1.5371193585\H,-0.32417

91665,-1.9250481443,-0.1264987914\H,-0.8946846079,-1.2346629892,1.3796

707861\C,-2.4917224604,-0.4162293446,-0.6758059333\H,-0.5638694992,0.2

919204243,-1.2526533236\C,-1.1925818558,1.3972360012,0.4771121736\H,3.

0651493584,0.9009528512,-1.4591959755\H,-3.0291554938,0.3235198097,-1.

2738031646\H,-2.4418815446,-1.344198585,-1.2524949088\H,-3.0778266439,

-0.6082657527,0.2280626288\H,-1.7871017176,2.1315220597,-0.0715803552\

H,-1.6804291066,1.2285996877,1.4425377611\H,-0.2172192038,1.8570252619

,0.6700589306\\Version=SGI-G94RevE.2\HF=-289.5721086\MP2=-290.542404\R

MSD=1.346e-09\RMSF=4.070e-06\Dipole=2.9121139,-0.0555678,-0.4322118\Di

poleDeriv=-0.2658849,0.0067338,0.0139804,-0.0610857,-0.1997581,0.02593

73,-0.0776785,-0.0534907,-0.1633969,0.3008308,-0.069506,0.0110112,-0.0

461705,0.277028,0.032165,0.0564897,0.0734451,0.2327331,0.2733602,0.014

3107,-0.1171855,0.019597,0.0959343,-0.0005791,-0.2159548,-0.10603,0.28

81842,0.1066183,0.0199308,0.0072083,0.0167014,0.0697889,0.016603,0.091

7094,0.0768565,-0.0177028,0.0608822,-0.0321708,-0.0197888,-0.096549,0.

0967719,-0.0143001,-0.0046683,-0.0128388,0.125001,0.1721697,0.048158,-

0.0447871,0.0797711,0.2627542,0.0137589,0.0038234,0.0516702,0.1812472,

-0.0237626,0.034596,-0.0118782,0.0508101,0.0758596,0.0191329,0.0579355

,0.0268578,0.0697869,0.1517361,0.024246,0.0461938,0.0142652,0.1625034,

0.014675,0.0347055,-0.0144848,0.078837,0.0579397,-0.0664382,0.0138703,

-0.0642669,-0.0142141,-0.0570166,0.0494775,0.0108318,0.0732205,0.01776

73,0.0570859,-0.002826,0.0319893,-0.0535469,-0.0583923,-0.0223013,-0.0

885647,0.0155542,-0.0026336,-0.0362109,0.0577819,0.0008875,0.0838713,0

.0004673,0.0042871,0.0204526,-0.0039194,0.0212324,0.0025457,-0.0100466

,0.0476306,0.0293305,0.0084018,-0.0521625,-0.0084549,0.0550609,-0.0685

163,-0.013981,0.1120882,0.0036431,-0.0260294,0.0129958,0.0882984,0.020

1382,-0.1080465,0.0539127,0.0221731,-0.0262413,0.0619556,-0.0344721,-0

.0217546,-0.0256586,0.0060817,0.0292906,0.1802501,-0.002501,-0.0000682

,-0.0123839,0.1167917,-0.0357607,0.0098373,-0.0262691,0.1300719,-0.001

7536,0.0210799,-0.0380243,0.0600664,-0.0094614,0.0742821,-0.0538235,0.

0524426,0.0395632,0.0405754,0.0304293,0.0218161,-0.0174659,-0.0688311,

-0.0901738,0.0009208,-0.0765599,0.031737,0.0268032,-0.0162091,0.016942

8,-0.0247322,0.0678015,0.0079168,0.0826962,0.0283822,-0.0690864,0.0260

579,0.0702928,-0.0359348,0.0546017,0.0107184,0.0274697,-0.0502773,0.05

73903,0.0335078,0.0460813,-0.0116338,0.0526025,-0.0410065,0.0446495,0.

0611455,0.0537487,0.0024245,-0.0482963,-0.1736662,-0.1029312,-0.046714

6,-0.0782584,0.01251,-0.0369739,-0.0314045,-0.0402805,0.0266527\Polar=

70.1165674,6.5064952,66.4255416,-3.1791639,-1.5164077,59.5389555\PG=C0

1 [X(C6H14N1)]\NImag=0\\@

**complex7**

1\1\MF-ELECTRON\Freq\RMP2-FU\6-31G(d)\C6H14N1(1+)\THEIS\23-Jan-1999\0\

\#N GEOM=ALLCHECK GUESS=READ RMP2(FULL)/6-31G(D) FREQ\\Er det kationis

ke intermediat der ogsaa paa MP2?\\1,1\N,2.1491238164,0.1820451474,-0.

1629460523\H,2.7580109142,-0.2183067359,-0.8793278204\C,1.384602295,-0

.6217423206,0.4943142764\C,-0.7989070337,-1.2845643827,-0.9624022633\C

,-1.425705596,-0.4205167225,-0.1365659476\C,2.1825890371,1.6427984123,

-0.0191477609\H,1.4732444416,-1.6888590445,0.3396695906\H,1.5311899329

,1.9307659691,0.8040156366\H,0.7668031839,-0.2339591172,1.2940226939\H

,-0.39930596,-0.9636565865,-1.9212090061\H,-0.7854360769,-2.3525038929

,-0.7600312892\C,-1.5648445528,1.0366739502,-0.4710652807\H,1.83848072

99,2.097066213,-0.9487512548\C,-2.0759146286,-0.8725350855,1.138541387

1\H,3.2086052022,1.9478397182,0.1874735947\H,-1.2192749664,1.672592966

5,0.3524821705\H,-1.0245901892,1.3024727402,-1.3834370049\H,-2.6207071

55,1.2831557547,-0.6238691164\H,-1.7029298778,-0.3078834156,2.00193818

52\H,-3.1537165588,-0.6849055758,1.094024974\H,-1.925157462,-1.9388181

315,1.3215745466\\Version=SGI-G94RevE.2\HF=-289.5427908\MP2=-290.50934

85\RMSD=5.391e-10\RMSF=9.004e-06\Dipole=2.4444496,0.1896282,0.0766599\

DipoleDeriv=-0.7989965,-0.1856714,-0.0823661,-0.3828557,-0.3347767,-0.

0471687,0.2492961,0.1475847,-0.1909224,0.3800794,-0.0184071,-0.0079954

,-0.0987559,0.1397793,0.0117141,-0.0466847,-0.0105511,0.3027928,1.3579

252,0.3546207,0.1400492,0.4684528,0.2580064,0.0241925,0.1035634,-0.068

6794,0.2193382,-0.9128015,-0.0919522,-0.1152911,0.2590541,0.0163809,0.

0129958,0.0160587,0.008665,-0.0286043,0.1350782,-0.1062663,-0.1891453,

-0.4746377,0.1213126,-0.1401614,-0.595696,-0.1880526,0.0331602,0.10454

37,-0.01944,0.0418673,0.1793382,0.4075491,0.006154,0.1316636,0.0665382

,0.0909035,0.0553131,-0.0220655,0.0105276,-0.0145597,0.1304132,0.00004

15,-0.0612594,-0.0243415,0.1013388,0.0646106,0.0202203,0.0747259,-0.04

92615,0.0628974,0.0522769,0.0601925,-0.0042726,0.0487417,0.0737623,-0.

0042041,0.0001839,0.058387,0.0682661,-0.0358946,-0.0647724,-0.0333293,

0.1005087,0.128913,-0.00865,0.0760706,-0.0161496,0.029595,0.0568132,0.

0847684,0.0363216,-0.0034721,0.1680176,0.0190652,0.0269402,0.0253971,-

0.0247304,0.0314206,0.0471586,0.0488733,0.0572763,-0.043319,0.090202,0

.0354048,0.038542,-0.067118,0.0443359,0.0681306,0.0631514,0.0270737,0.

1256016,0.0319659,-0.0424059,-0.0652451,0.0408008,-0.0300915,-0.062267

1,-0.0091627,0.0370373,-0.0653667,0.0103108,0.1104115,0.0782022,0.0022

68,0.032343,0.0762469,0.042927,-0.0127216,0.0482234,-0.0016325,-0.0239

03,0.00024,0.0528689,0.0120272,-0.026932,-0.0184005,0.131874,0.0780828

,-0.0717841,-0.0677834,0.0138564,-0.0064085,-0.0351118,-0.066081,-0.07

55611,-0.0548353,0.0266311,-0.0484736,0.103002,0.0063866,0.0228215,0.0

091478,0.0699652,0.0477459,-0.0401838,-0.0200527,0.0259462,-0.0119107,

0.0230711,0.0548223,-0.007637,-0.0086921,0.0132188,0.1107126,0.0446108

,-0.0590236,-0.086027,-0.0777694,0.006875,-0.0690549,0.0044934,-0.0501

129,-0.0351124,-0.027335,0.0267947,0.0107656,0.021534,0.0926937,0.0252

056,-0.0010985,0.0090918,0.0592153,0.0764787,0.0584446,-0.0031205,0.00

6773,-0.0743166,0.0464516,0.0219459,-0.0016538,0.0458789\Polar=85.9797

221,6.4030559,71.9478927,-7.1903056,0.9999939,61.5432643\PG=C01 [X(C6H

14N1)]\NImag=0\\@

**CH2=NHCH3+**

1\1\GINC-PC\Freq\RMP2-FU\6-31G(d)\C2H6N1(1+)\TIS501\11-Dec-1998\0\\# M

P2(FULL)/6-31* OPT=CALCALL MAXDISK=5242880000\\memeimo, Cs\\1,1\N,0.13

258212,-0.41595688,0.\C,1.23685712,0.23607112,0.\H,0.18326012,-1.43952

288,0.\H,1.21670112,1.32082512,0.\H,2.17778912,-0.30320688,0.\C,-1.218

84888,0.16918912,0.\H,-1.73935988,-0.17615588,-0.89351\H,-1.13515488,1

.25435312,0.\H,-1.73935988,-0.17615588,0.89351\\Version=SGI-G94RevE.2\

State=1-A'\HF=-133.425853\MP2=-133.8470443\RMSD=3.385e-09\RMSF=8.393e-

06\Dipole=0.5035572,-0.2646982,0.\DipoleDeriv=-0.2000375,0.0222605,0.,

-0.0927478,-0.238832,0.,0.,0.,-0.2179844,0.2462728,0.0458641,0.,0.1018

214,0.2792958,0.,0.,0.,0.1432431,0.1649235,0.0076528,0.,0.0536504,0.35

79013,0.,0.,0.,0.3332362,0.1141847,0.0664673,0.,0.03649,0.1401791,0.,0

.,0.,0.1563784,0.1656595,-0.0104088,0.,-0.0060546,0.0978087,0.,0.,0.,0

.1762043,0.2998142,-0.0880318,0.,-0.1832673,0.1001602,0.,0.,0.,0.13182

11,0.0838939,0.0238667,0.0276854,0.048069,0.1091598,-0.0515544,-0.0047

194,-0.0281535,0.0754059,0.0413951,-0.0915375,0.,-0.0060302,0.0451675,

0.,0.,0.,0.1262895,0.0838939,0.0238667,-0.0276854,0.048069,0.1091598,0

.0515544,0.0047194,0.0281535,0.0754059\Polar=33.9796297,3.0040297,24.4

597047,0.,0.,16.0913209\PG=CS [SG(C2H4N1),X(H2)]\NImag=0\\@

**CH2=NHCH2CH3+**

1\1\MF-ELECTRON\Freq\RMP2-FU\6-31G(d)\C3H8N1(1+)\THEIS\05-Jul-2000\0\\

#N GEOM=ALLCHECK GUESS=READ RMP2(FULL)/6-31G(D) FREQ\\Immonium ionen f

ra IRC komplekset er CCNC 120?\\1,1\N,-0.5650260672,0.5903412881,0.515

9732003\H,-1.0004760377,0.9456294659,1.373205169\C,0.3401819984,-0.574

2759657,0.6991109163\C,-0.8551763612,1.1886298984,-0.5806484503\H,-1.5

370661366,2.0317996634,-0.5613535706\C,0.9620207627,-1.0682301379,-0.5

874255846\H,-0.4199253652,0.849750699,-1.5124888523\H,-0.2715131637,-1

.3422500981,1.1803415274\H,1.0941491904,-0.2433330015,1.4185172118\H,1

.6023090883,-1.917406891,-0.3407125735\H,0.2122101232,-1.4223411505,-1

.2981989636\H,1.5933363724,-0.3109804733,-1.0573436388\\Version=SGI-G9

4RevE.2\HF=-172.4659604\MP2=-173.0239661\RMSD=3.037e-10\RMSF=5.693e-07

\Dipole=-0.7814901,0.9076751,0.2929102\DipoleDeriv=-0.2154363,0.003468

,0.0624293,0.0157593,-0.2066062,-0.0679924,0.0057211,0.0024789,-0.2460

269,0.2679089,0.0719045,-0.0463932,0.0685064,0.2202874,0.0565246,-0.03

07213,0.0370467,0.3228989,0.3297565,-0.1838126,0.0122614,-0.1675798,0.

3908701,0.006333,-0.0626441,0.0994267,0.084469,0.1461757,-0.0262083,-0

.0176347,-0.0308723,0.1625878,-0.0102224,0.0038862,-0.0369723,0.270285

1,0.1567861,0.0114861,0.0179398,0.0098788,0.1590367,-0.0099541,0.02533

71,-0.0191446,0.1122258,-0.0380652,0.0932804,0.0039235,0.0932203,-0.07

88205,0.0030157,0.0042114,0.0026561,0.0012705,0.1293171,0.0183695,0.01

65737,0.0207849,0.1264747,-0.0244905,0.0054359,-0.0106462,0.1649426,-0

.0020999,0.0107363,0.0337862,0.0317005,0.0533239,0.0177561,0.0507515,-

0.0119408,0.0929647,0.0653425,0.0344861,-0.0243727,0.005271,0.0075007,

-0.0431159,-0.0032682,-0.0607326,0.0713511,0.0932642,0.0426815,-0.0070

101,0.0439004,0.0681076,0.0171779,-0.012629,0.0241608,0.0873213,-0.015

6626,-0.0332129,-0.0631589,-0.0166982,0.1074796,0.0092704,-0.0196805,-

0.0268327,0.0094758,0.0827129,-0.0431784,0.0116557,-0.0738714,-0.01024

17,0.0456976,0.0335998,0.0005,0.028822\Polar=31.1323298,-7.55587,35.60

10253,1.2714125,-4.3241692,37.9331073\PG=C01 [X(C3H8N1)]\NImag=0\\

**CH3CH=NHCH3+**

1\1\GINC-PC\Freq\RMP2-FU\6-31G(d)\C3H8N1(1+)\TIS501\11-Dec-1998\0\\# M

P2(FULL)/6-31* OPT=CALCALL MAXDISK=5242880000\\arhiveve + ZPVE\\1,1\N,

-0.0000001212,0.6146059394,0.\H,0.9153868788,1.0737899394,0.\C,-0.0207

751212,-0.6735060606,0.\H,-1.0045061212,-1.1403580606,0.\C,1.191946878

8,-1.5138850606,0.\H,1.1727768788,-2.1678040606,0.878371\H,1.172776878

8,-2.1678040606,-0.878371\H,2.1130948788,-0.9291870606,0.\C,-1.1742041

212,1.5015439394,0.\H,-1.1369971212,2.1251929394,0.89337\H,-1.13699712

12,2.1251929394,-0.89337\H,-2.0773401212,0.8938189394,0.\\Version=SGI-

G94RevE.2\State=1-A'\HF=-172.4825627\MP2=-173.0387658\RMSD=7.524e-09\R

MSF=2.789e-05\Dipole=0.0123596,0.1873682,0.\DipoleDeriv=-0.2416467,-0.

0137079,0.,0.1960411,-0.4948272,0.,0.,0.,-0.2367029,0.2086313,0.113084

9,0.,0.0699868,0.2580153,0.,0.,0.,0.3139041,0.4267026,-0.2258145,0.,-0

.2334567,0.7417543,0.,0.,0.,0.1621894,0.0328701,0.0200912,0.,0.0524393

,0.1224803,0.,0.,0.,0.1254988,-0.115371,0.1581572,0.,0.1945107,-0.3322

056,0.,0.,0.,-0.0672154,0.0708455,0.0442648,0.0430921,-0.0280883,0.165

6136,0.0171185,0.0277561,0.0206457,0.0937936,0.0708455,0.0442648,-0.04

30921,-0.0280883,0.1656136,-0.0171185,-0.0277561,-0.0206457,0.0937936,

0.0508845,-0.0054249,0.,-0.0809563,0.0028989,0.,0.,0.,0.1187249,0.3034

826,-0.2547802,0.,-0.1204456,0.1821776,0.,0.,0.,0.1565337,0.0589882,0.

0513874,-0.0578089,0.0248927,0.0971134,-0.0055991,-0.0205708,-0.025142

4,0.0593239,0.0589882,0.0513874,0.0578089,0.0248927,0.0971134,0.005599

1,0.0205708,0.0251424,0.0593239,0.074779,0.0170895,0.,-0.071728,-0.005

748,0.,0.,0.,0.1208324\Polar=35.6413984,-6.5694279,48.2770353,0.,0.,25

.5281217\PG=CS [SG(C3H4N1),X(H4)]\NImag=0\\@

**CH2=N(CH3)2+**

1\1\GINC-PC\Freq\RMP2-FU\6-31G(d)\C3H8N1(1+)\TIS501\15-Dec-1998\0\\#N

GEOM=ALLCHECK GUESS=READ RMP2(FULL)/6-31G(D) FREQ\\Me2meimo aendring t

il C2v\\1,1\N,0.,0.1192801967,0.\C,0.,1.4037464989,0.\C,1.2502704544,-

0.6654871476,0.\H,-0.9413959514,1.9418221347,0.\H,0.9413959514,1.94182

21347,0.\C,-1.2502704544,-0.6654871476,0.\H,-1.2576042698,-1.292271149

3,-0.892410788\H,-2.1060177297,0.0069228645,0.\H,-1.2576042698,-1.2922

711493,0.892410788\H,2.1060177297,0.0069228645,0.\H,1.2576042698,-1.29

22711493,-0.892410788\H,1.2576042698,-1.2922711493,0.892410788\\Versio

n=SGI-G94RevE.2\State=1-A1\HF=-172.4664554\MP2=-173.0256692\RMSD=8.196

e-10\RMSF=1.891e-05\Dipole=0.,0.4061222,0.\DipoleDeriv=-0.2252185,0.,0

.,0.,-0.147079,0.,0.,0.,-0.1621517,0.1287572,0.,0.,0.,0.2295878,0.,0.,

0.,0.0856133,0.261626,-0.1690477,0.,-0.1509386,0.109202,0.,0.,0.,0.133

5613,0.0766358,-0.0148852,0.,-0.0327414,0.1453869,0.,0.,0.,0.1635732,0

.0766358,0.0148852,0.,0.0327414,0.1453869,0.,0.,0.,0.1635732,0.261626,

0.1690477,0.,0.1509386,0.109202,0.,0.,0.,0.1335613,0.0737589,-0.012761

,0.0706675,-0.0136352,0.0996391,-0.0126401,0.0233642,-0.030834,0.05804

34,0.062451,-0.01451,0.,0.058127,0.0048786,0.,0.,0.,0.1250478,0.073758

9,-0.012761,-0.0706675,-0.0136352,0.0996391,0.0126401,-0.0233642,0.030

834,0.0580434,0.062451,0.01451,0.,-0.058127,0.0048786,0.,0.,0.,0.12504

78,0.0737589,0.012761,-0.0706675,0.0136352,0.0996391,-0.0126401,-0.023

3642,-0.030834,0.0580434,0.0737589,0.012761,0.0706675,0.0136352,0.0996

391,0.0126401,0.0233642,0.030834,0.0580434\Polar=35.8183741,0.,44.3650

313,0.,0.,24.8331218\PG=C02V [C2(N1C1),SGV(C2H4),X(H4)]\NImag=0\\@

**TS:1  complex1**

1\1\MF-ION\Freq\RMP2-FU\6-31G(d)\C4H10N1(1+)\THEIS\09-Dec-1998\0\\#N G

EOM=ALLCHECK GUESS=READ RMP2(FULL)/6-31G(D) FREQ\\Ethylentab fra CH2NH

CH2CH2CH3+\\1,1\N,1.185575833,-0.4957978985,-0.2638677919\H,1.42361956

5,-0.7459527455,-1.2234657264\C,1.3707049874,0.8356103278,0.1188398761

\C,0.1873679415,-1.1827266108,0.3275671346\C,-1.3376144647,1.049377526

4,-0.0118638523\H,0.0296866996,-2.1980490488,-0.0264168583\H,1.5533077

718,0.94814019,1.1881983803\H,0.1241862657,-1.045585294,1.404288535\C,

-1.4431499905,-0.3341882412,-0.1760251139\H,-1.5749999817,-0.708724301

2,-1.1872857455\H,-2.0002569896,-0.8757107615,0.5865086558\H,-1.373587

3767,1.7104914489,-0.8749010614\H,0.2926840019,1.3056621723,-0.0339053

795\H,-1.5363258588,1.5064299378,0.9551538093\H,2.0988042304,1.3654456

783,-0.4922083326\\Version=SGI-G94RevE.2\HF=-211.4062245\MP2=-212.1263

038\RMSD=5.607e-10\RMSF=1.922e-05\Dipole=0.1855486,-0.1340841,-0.22877

52\DipoleDeriv=-0.9681918,0.5055326,0.0272171,0.3642256,-0.2685003,-0.

0374717,0.1700638,-0.0231332,-0.2279344,0.3518828,-0.1140705,-0.051979

3,-0.1316359,0.2308434,0.0267149,-0.0960137,0.0443336,0.2605934,0.6328

608,-0.0058025,-0.0223231,-0.2768371,0.0291868,0.0607011,0.0991157,0.0

229882,0.1365627,0.7315557,-0.5583955,-0.0100193,-0.1694729,0.3997344,

-0.0457291,-0.0275647,-0.1861692,0.2209178,0.2248485,0.1069051,-0.0518

387,0.1576719,0.1618118,-0.0423656,-0.1115843,0.0248137,0.070006,0.123

7962,0.0485286,0.0043151,-0.0216297,0.083048,-0.0040389,-0.0108002,0.0

202493,0.0800267,0.0106043,-0.0438747,0.0232937,0.012143,0.108434,0.05

15751,0.02002,0.0066409,0.0367085,0.0450819,0.0542998,-0.022633,0.0447

711,0.0045933,-0.0479977,-0.016488,-0.0004542,0.0536271,-0.1598317,0.3

006634,0.0261689,0.1684835,-0.3911665,0.0585088,0.0706648,0.1682557,0.

0279019,0.0542022,-0.03524,0.013049,-0.0239973,0.0756659,-0.0087161,0.

0206349,-0.0146207,0.0331662,0.1539743,-0.1105535,-0.0012292,-0.030389

7,0.1391723,0.0000639,-0.0747597,-0.0363274,0.065126,0.0648686,0.01829

24,0.0084731,-0.0077875,0.0916264,-0.0014033,0.0398781,0.0078775,0.058

9472,-0.4018074,-0.1258664,0.018709,-0.1001124,0.098728,-0.000278,-0.0

501139,-0.0306985,0.0680045,0.0579597,0.0394685,0.0174583,-0.0071368,0

.0861819,0.0088294,-0.0299312,0.000461,0.0384389,0.078196,-0.0798873,0

.0213382,0.0217043,0.1506407,-0.0183928,-0.0031217,-0.0042167,0.077907

3\Polar=64.1412384,-3.0986085,56.8729358,-1.7844491,0.4664921,40.19749

22\PG=C01 [X(C4H10N1)]\NImag=1\\@

**TS:2  complex2**

1\1\MF-ELECTRON\Freq\RMP2-FU\6-31G(d)\C5H12N1(1+)\THEIS\10-Dec-1998\0\

\#N GEOM=ALLCHECK GUESS=READ RMP2(FULL)/6-31G(D) FREQ\\Ethylentab fra

meprmeimo\\1,1\N,0.9344647373,0.0076416942,0.3651579911\C,1.7289721967

,-0.5627555911,-0.7312606469\C,0.6333185983,1.3698055533,0.304138408\C

,0.0029438354,-0.7587366004,0.9682569586\C,-1.8117930636,0.5905699856,

-0.5815683257\H,0.2126315353,-1.8240121211,1.0137054961\H,0.3915800608

,1.8014628645,1.2756619149\H,-0.4272644714,-0.3262350354,1.868176184\C

,-1.5354657028,-0.7172788856,-0.1692267839\H,-1.2343343893,-1.42771089

29,-0.9347382381\H,-2.1714088108,-1.1317698615,0.6102689003\H,-1.69894

76817,0.8707723225,-1.6265774256\H,-0.4094777691,1.3667441827,-0.27773

7881\H,-2.450090774,1.2324697718,0.0215965273\H,1.3617261687,1.9550226

965,-0.254235904\H,1.9336485815,-1.6102927117,-0.5162415435\H,1.175176

7839,-0.4740781196,-1.672690977\H,2.6676524207,-0.0154917266,-0.805330

6518\\Version=SGI-G94RevE.2\HF=-250.4398814\MP2=-251.3019872\RMSD=1.91

9e-09\RMSF=1.043e-05\Dipole=0.0126924,0.001279,0.0635516\DipoleDeriv=-

0.9863002,0.1764158,-0.1689027,0.1089403,-0.0779147,-0.0681027,-0.3090

418,0.025048,-0.3607742,0.4483101,-0.1026199,-0.0605576,-0.2111509,0.1

330073,0.0637245,-0.1128622,0.0837853,0.2511926,0.4773035,0.1492975,0.

040448,0.0225858,0.0311615,0.0907597,0.2992441,0.0983513,0.104975,0.57

63093,-0.230735,0.1583581,0.0221495,0.1183714,-0.0696894,0.2501923,-0.

2297374,0.314999,0.1272407,0.0729343,-0.0285865,0.1523233,0.1303213,-0

.0470867,-0.1435215,-0.0044849,0.0354963,0.1106822,0.0634162,-0.008598

3,0.0050166,0.0807227,-0.0142951,0.0055806,0.0090816,0.0732468,0.03392

89,-0.0509879,0.0334345,-0.0166394,0.0949841,0.0273542,0.0223546,-0.02

82096,0.0402712,0.0476493,0.0452133,-0.0124071,0.0364953,0.031444,-0.0

335436,-0.0146408,0.0114713,0.0518677,-0.1521056,0.1613625,-0.0863337,

0.0928428,-0.067287,0.0960496,-0.0579149,0.2470171,-0.0796108,0.061389

6,-0.0185227,0.0362983,-0.0079019,0.0420463,-0.0103722,0.0385297,-0.02

28124,0.0476716,0.1665354,-0.0485275,0.0497727,-0.0264611,0.0676129,-0

.0017588,-0.0126822,-0.0666454,0.0837418,0.0426372,0.0210394,0.0119595

,-0.0035593,0.0968966,-0.0116724,0.0363788,0.015128,0.0549377,-0.17809

73,-0.1809345,0.0100556,-0.2282839,-0.0271704,-0.0262048,-0.0712674,-0

.0853941,0.0702433,0.0540734,0.0440552,0.0201118,-0.0234872,0.0903884,

-0.0052907,-0.0146535,-0.0118128,0.043179,0.0700115,-0.0830209,0.04859

49,0.0080138,0.1255612,-0.0142909,0.0051902,-0.0425619,0.0910579,0.090

4587,-0.0286425,0.024033,0.0258078,0.0164179,0.0088187,0.0165254,0.058

0611,0.0610163,-0.044517,0.0247219,-0.0852077,0.0887559,0.0586755,0.02

19344,0.0611829,-0.0176669,0.027218,0.0544902,-0.0144651,0.0175272,-0.

0454474,0.0547609,-0.0063339,0.0014059,-0.0386181,0.0892707\Polar=77.5

944542,-1.3316181,61.9645079,2.1338792,-3.2959135,51.5769925\PG=C01 [X

(C5H12N1)]\NImag=1\\@

**TS:3  complex3**

1\1\GINC-PC\Freq\RMP2-FU\6-31G(d)\C5H12N1(1+)\TIS501\27-Jun-2000\0\\#N

GEOM=ALLCHECK GUESS=TCHECK RMP2(FULL)/6-31G(D) FREQ\\Retro-ene fra tr

1\1\GINC-PC\Freq\RMP2-FU\6-31G(d)\C5H12N1(1+)\TIS501\27-Jun-2000\0\\#N

GEOM=ALLCHECK GUESS=TCHECK RMP2(FULL)/6-31G(D) FREQ\\Retro-ene fra tr

ans immon\\1,1\N,0.4797269265,-0.5212324826,0.8508109273\H,1.500358429

9,-0.5550189595,0.8271521712\C,-0.1120988566,0.7570346678,0.8792059222

\C,-0.1829671708,-1.5251230076,0.2590933895\C,-0.7207965747,0.25809754

82,-1.7681434975\H,0.3303157187,-2.4807781427,0.2004146049\H,-1.091951

0167,0.713658068,1.3632849494\H,-1.2478071973,-1.5629843916,0.47304709

52\C,-0.3086946962,-1.0655173661,-1.6439673356\H,0.7004603247,-1.31555

06602,-1.9582428306\H,-1.0514964709,-1.842168166,-1.8117331481\H,-0.03

67908511,1.0147494549,-2.1459566946\H,-0.3893462398,0.9058690466,-0.25

9592257\H,-1.778774234,0.5090417345,-1.7887150987\C,0.7781653699,1.871

5187161,1.379041017\H,0.2585860024,2.8258827992,1.2790194738\H,1.02314

81136,1.7298200556,2.433806969\H,1.7035605046,1.9300431888,0.800461300

3\\Version=SGI-G98RevA.7\HF=-250.4484483\MP2=-251.3051872\RMSD=2.224e-

09\RMSF=1.071e-04\Dipole=0.0845262,-0.5447548,-0.1612326\DipoleDeriv=-

0.3783961,-0.0490099,-0.4497248,0.0090276,-0.154137,-0.0061453,-0.3063

755,0.1899777,-0.9626015,0.2901787,-0.0186222,0.1301448,-0.0447176,0.1

968408,-0.0533483,0.076196,-0.0466484,0.3126109,0.2261573,0.1596189,0.

1144879,-0.0127232,0.1583022,0.0142145,0.1921902,0.3390765,0.6930548,0

.2700713,0.049925,0.1966048,0.0116222,0.2285573,-0.0473991,0.2157652,-

0.448767,0.7998631,0.1024096,0.0302888,0.1011053,0.086822,0.2429621,0.

1028167,0.0639654,0.1533989,0.1119143,0.0802958,-0.0035379,0.0254366,-

0.0047654,0.0837704,-0.0100877,-0.0025372,0.0622336,0.1103429,0.000196

7,-0.0664442,-0.0266099,-0.0802769,0.0302321,-0.0141045,-0.0047236,-0.

0798668,0.0099381,0.050062,0.025928,0.0011319,0.0668292,0.0422992,0.03

23397,-0.0006311,0.0576187,0.0181299,0.0078817,-0.0288935,-0.1268364,0

.0231073,-0.2489065,0.196788,-0.1180143,0.3330001,-0.2368465,0.0180184

,-0.0084421,-0.0083299,-0.0085728,0.055769,-0.0269504,-0.0021858,-0.03

90055,0.0749625,0.0855291,0.0177005,0.0842354,-0.009595,0.0979844,-0.0

049134,0.0342762,-0.099095,0.144626,0.03598,-0.0280878,-0.0246286,-0.0

153118,0.0715931,-0.0083109,-0.0106242,0.0045777,0.0817835,0.0345708,-

0.056971,-0.0506877,-0.0755478,-0.0506076,-0.1825152,-0.1235561,-0.331

9124,-0.3019961,0.044784,0.0086712,0.0347268,-0.0169347,0.084722,0.000

0147,-0.0183708,0.0183735,0.0595154,0.0350167,0.0017238,0.0257817,0.01

93538,0.0258509,0.0126654,-0.0280675,-0.1440784,-0.0401282,0.0435749,0

.0540322,-0.0281439,0.0193457,0.0308848,-0.0102324,-0.0245504,0.031295

3,0.1008681,0.0737372,-0.0662298,-0.042493,-0.0036694,0.0378859,0.0380

789,-0.0212025,0.0126494,0.0061807,-0.0200681,-0.02165,0.0437989,0.036

0067,0.065997,-0.0329108,0.078446,-0.0128281,0.0177823\Polar=53.151555

8,0.3610417,68.5940849,9.6843202,4.4692888,72.0652882\PG=C01 [X(C5H12N

1)]\NImag=1\\@

**TS:4  complex4**

1\1\GINC-PC\Freq\RMP2-FU\6-31G(d)\C5H12N1(1+)\TIS501\11-Dec-1998\0\\#N

GEOM=ALLCHECK GUESS=READ RMP2(FULL)/6-31G(D) FREQ\\ethylentab fra sbu

meimo\\1,1\N,0.4678790345,0.3115147167,1.0581359469\H,1.4885097159,0.3

253685881,1.0865453518\C,-0.1864161854,1.5387628346,1.0574185616\C,-0.

1092240301,-0.7372393446,0.4245574185\C,-0.6319279234,1.1250453021,-1.

5485437311\C,0.617698685,-2.0521369797,0.4355060907\H,-1.1953797672,1.

491471006,1.4681915786\H,-1.184591568,-0.7822515337,0.6002431151\C,-0.

1969196865,-0.1996257398,-1.4210615087\H,0.8201829269,-0.4262250056,-1

.7292741265\H,-0.9243207547,-0.9764228767,-1.6449279448\H,0.0395621799

,1.8822874803,-1.9484867406\H,-0.3791902789,1.7297756221,-0.1157614627

\H,-1.6952121887,1.3460376439,-1.615506388\H,0.4079909624,2.3522202176

,1.4688226698\H,0.1665928235,-2.7469039689,-0.2743613046\H,1.672813716

9,-1.9289085118,0.1776158921\H,0.5486238333,-2.4958881139,1.432686746\

\Version=SGI-G94RevE.2\HF=-250.4477444\MP2=-251.308985\RMSD=8.871e-10\

RMSF=3.774e-06\Dipole=0.1363031,0.4172575,0.1204683\DipoleDeriv=-0.322

8931,0.0572241,-0.3534827,0.0473275,-0.1609683,0.1300264,-0.2813249,0.

27988,-0.9236007,0.2760865,-0.0041475,0.1246682,0.0206129,0.1903196,-0

.0432887,0.0918495,-0.0404267,0.3240358,0.1690069,0.0473435,0.0661117,

-0.030679,-0.0882153,-0.1203791,0.1116987,0.1997046,0.6008638,0.254506

6,-0.069997,0.1334679,-0.0465602,0.5744376,-0.086653,0.2631592,-0.6266

722,0.7324608,0.0966503,-0.0012445,0.084108,0.0432873,0.258508,0.15017

36,0.0114848,0.1752794,0.12589,0.0324586,-0.0120273,0.0247804,0.022392

6,-0.0911841,-0.0045542,-0.0477584,0.2037663,-0.0148079,0.0490685,-0.0

431284,-0.0198599,-0.0662979,0.0788797,0.0039124,0.0056081,-0.0757934,

0.0296479,0.0050281,0.041623,0.0032335,0.0829153,-0.014821,0.0283113,-

0.0087394,0.076634,0.0155489,0.0028716,0.0000544,-0.1083459,0.0687527,

-0.3631799,0.1489077,-0.1483941,0.4174808,-0.1802413,0.0138881,0.00314

41,-0.012042,0.0020681,0.0531486,-0.0385422,-0.0017896,-0.0558812,0.07

73592,0.0835529,0.0052551,0.089075,-0.0187942,0.0838301,-0.016367,0.05

45981,-0.119854,0.1431057,0.0459279,-0.0203848,-0.0310038,-0.0104568,0

.085762,-0.0117904,-0.0039859,0.0129807,0.0683124,0.0643533,-0.0135318

,-0.0170966,-0.0319502,0.0030699,-0.1647158,-0.0434994,-0.299452,-0.28

50745,0.0398972,0.003608,0.0307499,-0.0238073,0.088407,0.001375,-0.018

2711,0.0277882,0.0492901,0.0711794,-0.0279397,0.0065938,0.0037991,0.13

07572,0.0083946,0.0030202,-0.1051552,0.0950379,0.0506912,-0.0188373,-0

.0590315,0.0028554,0.0864488,-0.0022327,-0.0391479,-0.0754956,0.042544

3,-0.0218511,-0.0132192,0.0270988,-0.0822246,0.0469813,0.0158355,0.034

7362,-0.0011779,0.0807704,0.0895771,0.0662053,0.0109752,0.0167593,0.03

78188,0.0015865,0.0167559,0.0063943,0.0188574\Polar=51.8858801,-5.4264

021,71.9108575,7.4497324,-1.8433476,68.9853761\PG=C01 [X(C5H12N1)]\NIm

ag=1\\@

**TS:5  complex5**

1\1\GINC-VPP08\Freq\RMP2-FU\6-31G(d)\C5H12N1(1+)\TIS501\11-Dec-1998\0\

\#N GEOM=ALLCHECK GUESS=READ RMP2(FULL)/6-31G(D) FREQ\\"iprtab" fra ib

umeim\\1,1\N,1.2565985592,-0.8076257521,-0.1490542098\H,1.0801527476,-

1.4226587477,-0.9429896425\C,1.8550780802,0.4257230839,-0.4086276039\C

,0.3910761582,-0.8694815266,0.8861946743\C,-0.5697080944,1.5008767231,

0.1003920396\H,-0.0956923104,-1.8284207507,1.0432686337\H,2.4323482438

,0.8059642759,0.4351036248\H,0.7306916185,-0.3620507828,1.7866921091\C

,-1.0892417633,0.2349979574,0.4049958458\C,-1.8486631545,-0.515861849,

-0.6651617734\H,-1.4714839259,0.1380602563,1.4236265642\H,-0.755023350

8,1.9432759636,-0.8778652664\H,0.9135004592,1.1629396545,-0.4494858744

\H,-0.2966368736,2.1918593843,0.896076961\H,2.4035648693,0.4573482511,

-1.3480141794\H,-2.8253795793,-0.0484978697,-0.8128439928\H,-1.3224058

205,-0.4823726303,-1.6233383611\H,-2.0210733489,-1.5595930727,-0.39361

02018\\Version=Fujitsu-VP-Unix-G94RevE.2\HF=-250.4417315\MP2=-251.3036

103\RMSD=1.505e-09\RMSF=1.426e-05\Dipole=0.5029146,-0.0912408,-0.00543

12\DipoleDeriv=-0.5690237,0.5504552,-0.0450413,0.5068107,-0.6148962,-0

.1020571,0.0869045,-0.1546256,-0.2007241,0.2596219,-0.1112028,-0.00772

71,-0.1529017,0.3420057,0.065523,-0.0290585,0.0783098,0.2258004,0.5004

343,-0.1574448,-0.0987262,-0.3623577,0.1903979,0.1699966,0.0859432,0.0

378809,0.0936773,0.3645944,-0.5679726,0.0923071,-0.2161439,0.5193292,-

0.0571452,-0.1198294,-0.065201,0.2666194,0.1593696,0.0035511,-0.156210

4,0.0374613,0.0070948,-0.0642525,-0.2471691,0.0346573,0.1345677,0.1214

824,0.0125063,-0.0125437,-0.0537084,0.074044,-0.000722,0.003023,-0.006

1281,0.0833016,0.0256734,-0.0079871,0.0407442,0.059396,0.1137585,-0.00

61511,0.0070283,-0.024604,0.0141027,0.0356404,0.0237166,-0.0486166,0.0

059251,-0.0124926,-0.0199446,-0.0182214,0.0229649,0.0726694,0.206689,0

.2835215,0.0382985,0.0919646,-0.3183166,0.1617054,0.2530083,0.2020057,

-0.0390382,-0.0994243,-0.0412231,-0.0526886,0.0815757,0.0965635,-0.006

4376,0.0304038,-0.0219655,-0.0051927,0.0357819,-0.1056316,0.0116848,-0

.0456274,0.1570916,-0.0280289,-0.1081548,-0.0198417,0.0469142,0.077618

4,0.0365941,-0.0128013,0.0152009,0.0911518,-0.019765,0.0255896,-0.0210

738,0.0383745,-0.3699397,0.0485323,0.1640548,0.070093,0.0993567,-0.043

6887,0.1116228,-0.0495958,0.0291241,0.04808,0.0422489,-0.0101058,-0.01

44147,0.0604856,-0.0110073,-0.037607,-0.0228747,0.0412659,0.0687237,-0

.0525213,0.0297829,0.0322588,0.1471421,-0.0577595,-0.0134951,-0.009788

4,0.0806938,0.0210665,0.0192643,-0.0221805,0.0290859,0.0476786,-0.0096

244,-0.0469527,-0.0385413,0.0916887,0.0176514,-0.0043877,0.10585,-0.03

50854,0.0439759,0.0104195,0.0330649,-0.0059173,-0.0151861,0.0959605,0.

0279806,-0.016081,-0.0495328,-0.0443706,0.0189394,-0.0161004,0.0643386

,0.0413414\Polar=70.9624982,-3.2875441,66.1267607,-4.1325806,-1.518665

4,52.4715253\PG=C01 [X(C5H12N1)]\NImag=1\\@

**TS:6  complex6**

\1\GINC-PC\Freq\RMP2-FU\6-31G(d)\C5H12N1(1+)\TIS501\27-Jun-2000\0\\#N

GEOM=ALLCHECK GUESS=TCHECK RMP2(FULL)/6-31G(D) FREQ\\konformation af

propentabs TS (fra bumeim\\1,1\N,1.7265608427,-0.0889478178,-0.0072142

079\H,2.3826090306,0.1995673604,0.7150962561\C,0.9888024002,0.88352732

32,-0.6104211476\C,-0.4857656563,1.2466177871,0.3780593129\C,-1.206110

7887,0.0640080062,0.610131322\C,1.0968863132,-1.3318282627,0.158101730

7\H,1.478956931,1.8518306209,-0.6821760594\H,0.7883930486,-1.773551920

4,-0.792711083\H,0.5250944244,0.5559577531,-1.5402021796\H,-0.12982697

9,1.7860404487,1.2532693474\H,-0.9111270697,1.8961230423,-0.3900374313

\H,-1.3437681183,-0.271140462,1.6389276104\H,0.0985981302,-1.086638999

2,0.6952160747\C,-2.0338330321,-0.579134001,-0.445601121\H,1.674168277

8,-2.0304679208,0.7614893255\H,-2.1195123107,-1.657340132,-0.295677885

2\H,-3.0492293442,-0.1651571025,-0.4070617883\H,-1.6401573376,-0.38173

30808,-1.4472533142\\Version=SGI-G98RevA.7\HF=-250.4586857\MP2=-251.30

89371\RMSD=1.748e-09\RMSF=2.884e-04\Dipole=0.3382653,0.1952853,0.32184

17\DipoleDeriv=-1.518663,0.0710968,0.2018821,0.2571936,-0.1914048,-0.0

720465,0.207956,0.0390471,-0.2671516,0.4996735,-0.0010006,-0.0046787,0

.0245444,0.1469956,0.0104231,0.0147351,0.0141688,0.2175842,1.295686,0.

0423654,-0.2307662,-0.4213935,0.157878,0.0524836,-0.4512031,-0.244184,

0.3640597,-0.8660165,-0.246025,0.191778,-0.2626555,-0.1786593,0.120356

4,0.4129889,0.3217532,-0.1394785,0.7881685,0.085569,0.0556479,0.110061

,0.4940426,-0.1033242,0.4700017,-0.0583109,0.1425431,0.8098583,-0.2158

488,-0.0222965,-0.0988106,0.175323,0.047098,-0.3886779,0.2139527,0.123

3014,0.0805255,-0.0528239,0.0029067,0.0185485,0.0838784,-0.0036337,0.0

315748,0.0260119,0.0830041,0.0113253,0.0321557,-0.0324604,0.0431495,0.

0611933,0.0297921,-0.0138819,-0.0327188,0.0081795,-0.0385399,-0.020977

2,-0.0132641,-0.0412726,0.0397773,-0.0500257,0.0623337,-0.0011703,0.02

2196,0.0927766,0.0051915,-0.0273169,-0.0032412,0.0441163,-0.01033,-0.0

401858,-0.0191091,0.0435724,0.2923256,0.0505696,-0.0629091,-0.0245567,

0.0908372,-0.0017407,-0.0591477,-0.1019508,0.0754626,0.0394141,0.00200

62,-0.0233983,0.0256837,0.0651872,-0.0053465,-0.0381577,0.011103,0.033

7574,-0.3712411,0.2181466,0.0092594,0.4538487,-0.1702792,-0.0381881,0.

0603527,-0.0957537,0.0603182,-0.5359172,-0.098762,-0.0889904,0.0936659

,-0.0179637,-0.0151838,-0.0949438,-0.0413587,-0.0591643,0.0947598,0.07

27939,-0.0583625,-0.0041154,0.0841459,0.0072506,-0.0004225,-0.0253961,

0.1068519,0.1519797,0.0429336,-0.0081896,-0.0338601,-0.0116021,0.00890

06,-0.074296,0.0190464,0.0735519,0.0931304,0.0343592,0.0125552,-0.0459

996,0.0821737,-0.0165409,-0.1083963,-0.0375012,0.1174317,0.0807544,-0.

0217501,0.0986033,-0.0907899,0.0443604,0.0400556,0.0093699,0.0123706,-

0.0060197\Polar=88.9091013,0.1336152,62.3570084,-2.3399051,-2.16398,49

.3526365\PG=C01 [X(C5H12N1)]\NImag=1\\@

**TS:7  complex7**

1\1\MF-ELECTRON\Freq\RMP2-FU\6-31G(d)\C6H14N1(1+)\THEIS\23-Jan-1999\0\

\#N GEOM=ALLCHECK GUESS=READ RMP2(FULL)/6-31G(D) FREQ\\hoverfoersels T

S i ipentmeim\\1,1\N,1.9429599572,0.4177598956,-0.267081972\H,2.242293

2349,0.5393684505,-1.2304238059\C,1.520903285,-0.8463094494,0.09203362

3\C,-0.0684997472,-1.1904446477,-0.4681974292\C,-1.0522070054,-0.25987

80188,-0.0395287505\C,1.1886007676,1.4735534141,0.3002592994\H,2.11773

8555,-1.6442364342,-0.3483568558\H,1.3150853037,1.5191577014,1.3851906

326\H,1.4449417088,-0.9537090464,1.1754629932\H,0.0155941372,-1.295047

3401,-1.5495255622\H,-0.1728220883,-2.1561731822,0.035932764\C,-1.8292

423108,0.5212941111,-1.0425597004\H,0.091182427,1.2356000752,0.1307205

462\C,-1.5529714891,-0.3068052187,1.3598238225\H,1.4175355131,2.437336

6425,-0.1534584765\H,-2.2613727706,1.4334388321,-0.6275301585\H,-1.242

5118708,0.749510894,-1.9354784447\H,-2.665464987,-0.1187669339,-1.3640

640597\H,-1.8899399042,0.671588555,1.7087806559\H,-2.4316341051,-0.968

914609,1.3746487737\H,-0.8208458543,-0.7219340184,2.0566896136\\Versio

n=SGI-G94RevE.2\HF=-289.5148285\MP2=-290.4928565\RMSD=1.207e-09\RMSF=1

.035e-05\Dipole=-0.183534,-0.2042805,-0.287705\DipoleDeriv=-1.7761584,

-0.2404691,0.0642672,-0.5525226,-0.4534324,-0.000944,0.1636461,0.08898

49,-0.2244028,0.4938601,0.0722346,-0.0738024,0.0545124,0.1371121,-0.02

97217,-0.0816699,-0.0269111,0.1776468,1.905515,0.1632305,-0.0123641,0.

7058535,0.4513396,-0.065462,0.4364441,-0.1908071,0.1730392,-1.8633036,

0.1326258,0.0753937,0.4354255,-0.25994,-0.0057507,-0.1836667,0.1333262

,-0.0038157,1.5586669,-0.0422291,-0.0464861,-0.0866069,0.5802382,-0.09

23618,-0.2213606,-0.0799937,0.5736185,1.1161263,0.3326391,-0.0031142,0

.0560131,0.1975255,0.0701425,0.0692215,0.1428183,0.1785007,0.0062216,0

.0390277,0.0199424,-0.0031112,0.0504064,-0.0094336,-0.0594072,-0.02406

17,0.0833845,-0.0231408,-0.0363246,-0.0165203,-0.0484977,0.0389286,0.0

438212,-0.0093029,-0.0126521,-0.0190791,-0.0994946,-0.0317429,0.031596

2,0.0180291,0.0626755,-0.0289512,-0.0417153,0.0137669,-0.0234722,0.138

3462,-0.0070495,0.0005334,0.0026989,0.0530065,0.0132454,0.0219158,-0.0

014445,-0.0069236,0.4059303,-0.0323631,-0.0141614,0.0726501,0.1168442,

0.0217124,0.0717524,-0.0521939,0.0413461,-0.4789345,0.0267836,-0.18432

04,-0.175856,-0.0328964,0.0032995,-0.2597432,0.0685,-0.1955068,-0.5398

84,-0.2367547,-0.0357021,-0.6226101,-0.2207245,-0.0284887,-0.1504234,-

0.0866154,0.0032259,-0.4795639,-0.0737244,0.2138445,-0.2850883,-0.0837

848,0.1261838,0.1187641,0.0320786,-0.2257144,0.0968802,-0.0660158,0.01

68067,0.0034872,0.0398941,0.0096484,-0.0079998,0.0253674,0.071424,0.13

39165,0.0076859,0.0241994,0.0954589,0.0277317,-0.0158891,-0.0095691,-0

.064772,0.0430613,0.0374603,-0.0140453,0.0927917,0.0871905,0.0738295,0

.0258432,0.035283,0.0086797,0.0417576,0.0761301,-0.0447309,0.0066131,0

.1061123,0.0468132,0.0354895,-0.0701113,0.0036821,0.1207392,0.1542644,

0.021861,-0.0309269,0.050083,0.0012569,-0.0289352,0.041977,0.0201425,0

.0751063,0.1029803,-0.0276748,-0.0444781,0.0022528,0.1002359,-0.040281

8,0.1175008,-0.0135951,0.070898,0.0341815,0.0570357,-0.0841124,0.08452

56,0.07294,-0.0031662,0.0184647,0.0157002,0.0451664\Polar=110.2943874,

4.9715257,68.9684876,-2.7454461,-0.1815529,62.4585959\PG=C01 [X(C6H14N

1)]\NImag=1\\@

ethylene

1\1\GINC-PC\Freq\RMP2-FU\6-31G(d)\C2H4\TIS501\11-Dec-1998\0\\#N GEOM=A

LLCHECK GUESS=READ RMP2(FULL)/6-31G(D) FREQ\\ethylen\\0,1\C,0.,0.,0.66

73927547\C,0.,0.,-0.6673927547\H,0.,0.9226761809,1.2380228132\H,0.,-0.

9226761809,-1.2380228132\H,0.,0.9226761809,-1.2380228132\H,0.,-0.92267

61809,1.2380228132\\Version=SGI-G94RevE.2\State=1-AG\HF=-78.031069\MP2

=-78.294286\RMSD=1.117e-09\RMSF=1.092e-04\Dipole=0.,0.,0.\DipoleDeriv=

-0.2870615,0.,0.,0.,0.1095012,0.,0.,0.,-0.0052344,-0.2870615,0.,0.,0.,

0.1095012,0.,0.,0.,-0.0052344,0.1435308,0.,0.,0.,-0.0547506,-0.0639354

,0.,-0.0522626,0.0026172,0.1435308,0.,0.,0.,-0.0547506,-0.0639354,0.,-

0.0522626,0.0026172,0.1435308,0.,0.,0.,-0.0547506,0.0639354,0.,0.05226

26,0.0026172,0.1435308,0.,0.,0.,-0.0547506,0.0639354,0.,0.0522626,0.00

26172\Polar=8.1863062,0.,20.0645294,0.,0.,28.9563348\PG=D02H [C2"(C1.C

1),SG(H4)]\NImag=0\\@

Propene

1\1\GINC-PC\Freq\RMP2-FU\6-31G(d)\C3H6\TIS501\11-Dec-1998\0\\#N GEOM=A

LLCHECK GUESS=READ RMP2(FULL)/6-31G(D) FREQ\\Propen\\0,1\C,-0.00973327

13,0.479200646,0.\C,1.2881969976,0.159938953,0.\C,-1.129437398,-0.5152

692855,0.\H,2.0625747488,0.9193302138,0.\H,1.6181749284,-0.8750120099,

0.\H,-0.2941853536,1.5306315589,0.\H,-0.7443661961,-1.5382225684,0.\H,

-1.7681780484,-0.3899745378,0.8803750039\H,-1.7681780484,-0.3899745378

,-0.8803750039\\Version=SGI-G94RevE.2\State=1-A'\HF=-117.0706844\MP2=-

117.4696586\RMSD=3.080e-09\RMSF=1.971e-05\Dipole=-0.1095347,-0.0067336

,0.\DipoleDeriv=0.1635882,0.0192536,0.,0.0989588,0.1497279,0.,0.,0.,-0

.1883361,-0.0874428,-0.0073348,0.,-0.0106206,0.0855465,0.,0.,0.,-0.314

8241,-0.0219859,-0.042594,0.,-0.0111269,0.0154082,0.,0.,0.,0.1250539,-

0.0375673,-0.0640444,0.,-0.075559,-0.0255374,0.,0.,0.,0.1518181,0.0347

255,0.0103186,0.,0.041806,-0.094333,0.,0.,0.,0.1376399,0.0023136,0.024

2753,0.,0.0125703,-0.1270643,0.,0.,0.,0.1232947,0.0160953,0.0850201,0.

,0.0148993,-0.1072587,0.,0.,0.,0.0701505,-0.0348633,-0.0124471,0.08273

33,-0.035464,0.0517554,-0.0344525,0.108715,-0.0137184,-0.0523985,-0.03

48633,-0.0124471,-0.0827333,-0.035464,0.0517554,0.0344525,-0.108715,0.

0137184,-0.0523985\Polar=41.6780625,-0.372716,29.8300288,0.,0.,18.5089

151\PG=CS [SG(C3H4),X(H2)]\NImag=0\\@

Isobutene

1\1\GINC-AAUSGI3\Freq\RMP2-FU\6-31G(d)\C4H8\SNFSTEEN\02-Feb-1999\0\\#N

GEOM=ALLCHECK GUESS=READ RMP2(FULL)/6-31G(D) FREQ\\isobuten, geometri

til G2(MP2), C2v symmetri\\0,1\C,0.,1.4591826786,0.\C,0.,0.1196100045

,0.\H,-0.9242158348,2.028917974,0.\H,0.9242158348,2.028917974,0.\C,-1.

2726918356,-0.6789792003,0.\C,1.2726918356,-0.6789792003,0.\H,-1.32339

82728,-1.3296813466,0.8802129736\H,-2.1532814933,-0.0320581281,0.\H,-1

.3233982728,-1.3296813466,-0.8802129736\H,1.3233982728,-1.3296813466,0

.8802129736\H,1.3233982728,-1.3296813466,-0.8802129736\H,2.1532814933,

-0.0320581281,0.\\Version=SGI-G94RevE.2\State=1-A1\HF=-156.1097781\MP2

=-156.6463969\RMSD=1.394e-09\RMSF=6.175e-05\Dipole=0.,-0.1595063,0.\Di

poleDeriv=0.017174,0.,0.,0.,-0.0948235,0.,0.,0.,-0.3319913,0.2219647,0

.,0.,0.,0.1714212,0.,0.,0.,-0.1225574,-0.078388,0.0755909,0.,0.0490667

,0.0079502,0.,0.,0.,0.1453951,-0.078388,-0.0755909,0.,-0.0490667,0.007

9502,0.,0.,0.,0.1453951,-0.0362025,0.0007838,0.,-0.0194472,0.0158888,0

.,0.,0.,0.1201456,-0.0362025,-0.0007838,0.,0.0194472,0.0158888,0.,0.,0

.,0.1201456,0.0399687,-0.0316413,-0.025547,-0.0324792,-0.0251529,0.087

3195,0.0143534,0.1090708,-0.0564179,-0.0849164,0.0450426,0.,0.1093173,

-0.0118321,0.,0.,0.,0.0745694,0.0399687,-0.0316413,0.025547,-0.0324792

,-0.0251529,-0.0873195,-0.0143534,-0.1090708,-0.0564179,0.0399687,0.03

16413,0.025547,0.0324792,-0.0251529,0.0873195,-0.0143534,0.1090708,-0.

0564179,0.0399687,0.0316413,-0.025547,0.0324792,-0.0251529,-0.0873195,

0.0143534,-0.1090708,-0.0564179,-0.0849164,-0.0450426,0.,-0.1093173,-0

.0118321,0.,0.,0.,0.0745694\Polar=41.6366774,0.,52.1662171,0.,0.,28.04

60117\PG=C02V [C2(C1C1),SGV(C2H4),X(H4)]\NImag=0\\@
